# Supplementary material for: Bromine and iodine–cucurbit[6]uril complexes: preparation and applications in synthetic organic chemistry
Source: Royal Society of Chemistry journal article supplement (doi:10.1039/c4nj00284a), 2014-01-01
Supplement: c4nj00284a2.pdf [file c4nj00284a2.pdf]

# **Bromide and Iodide-cucurbit[6]uril Complexes: Preparation and Applications in Synthetic Organic Chemistry**

K. R. Kishore K. Reddy,<sup>a</sup> Thiago de S. Cavallini,<sup>b</sup> Grégoire J. F. Demets,<sup>\*b</sup> and Luiz F. Silva, Jr.<sup>\*a</sup>

<sup>a</sup> Departamento de Química Fundamental, Instituto de Química, Universidade de São Paulo, Av. Prof. Lineu Prestes, 748, CP 26077, CEP 05513-970 São Paulo SP, Brazil

<sup>b</sup> Departamento de Química, Faculdade de Filosofia Ciências e Letras de Ribeirão Preto, Universidade de São Paulo, Av. Bandeirantes 3900, CEP 14040-901, Ribeirão Preto, SP, Brazil

[greg@usp.br](mailto:greg@usp.br) or [luizfsjr@iq.usp.br](mailto:luizfsjr@iq.usp.br)

## **3. NMR**

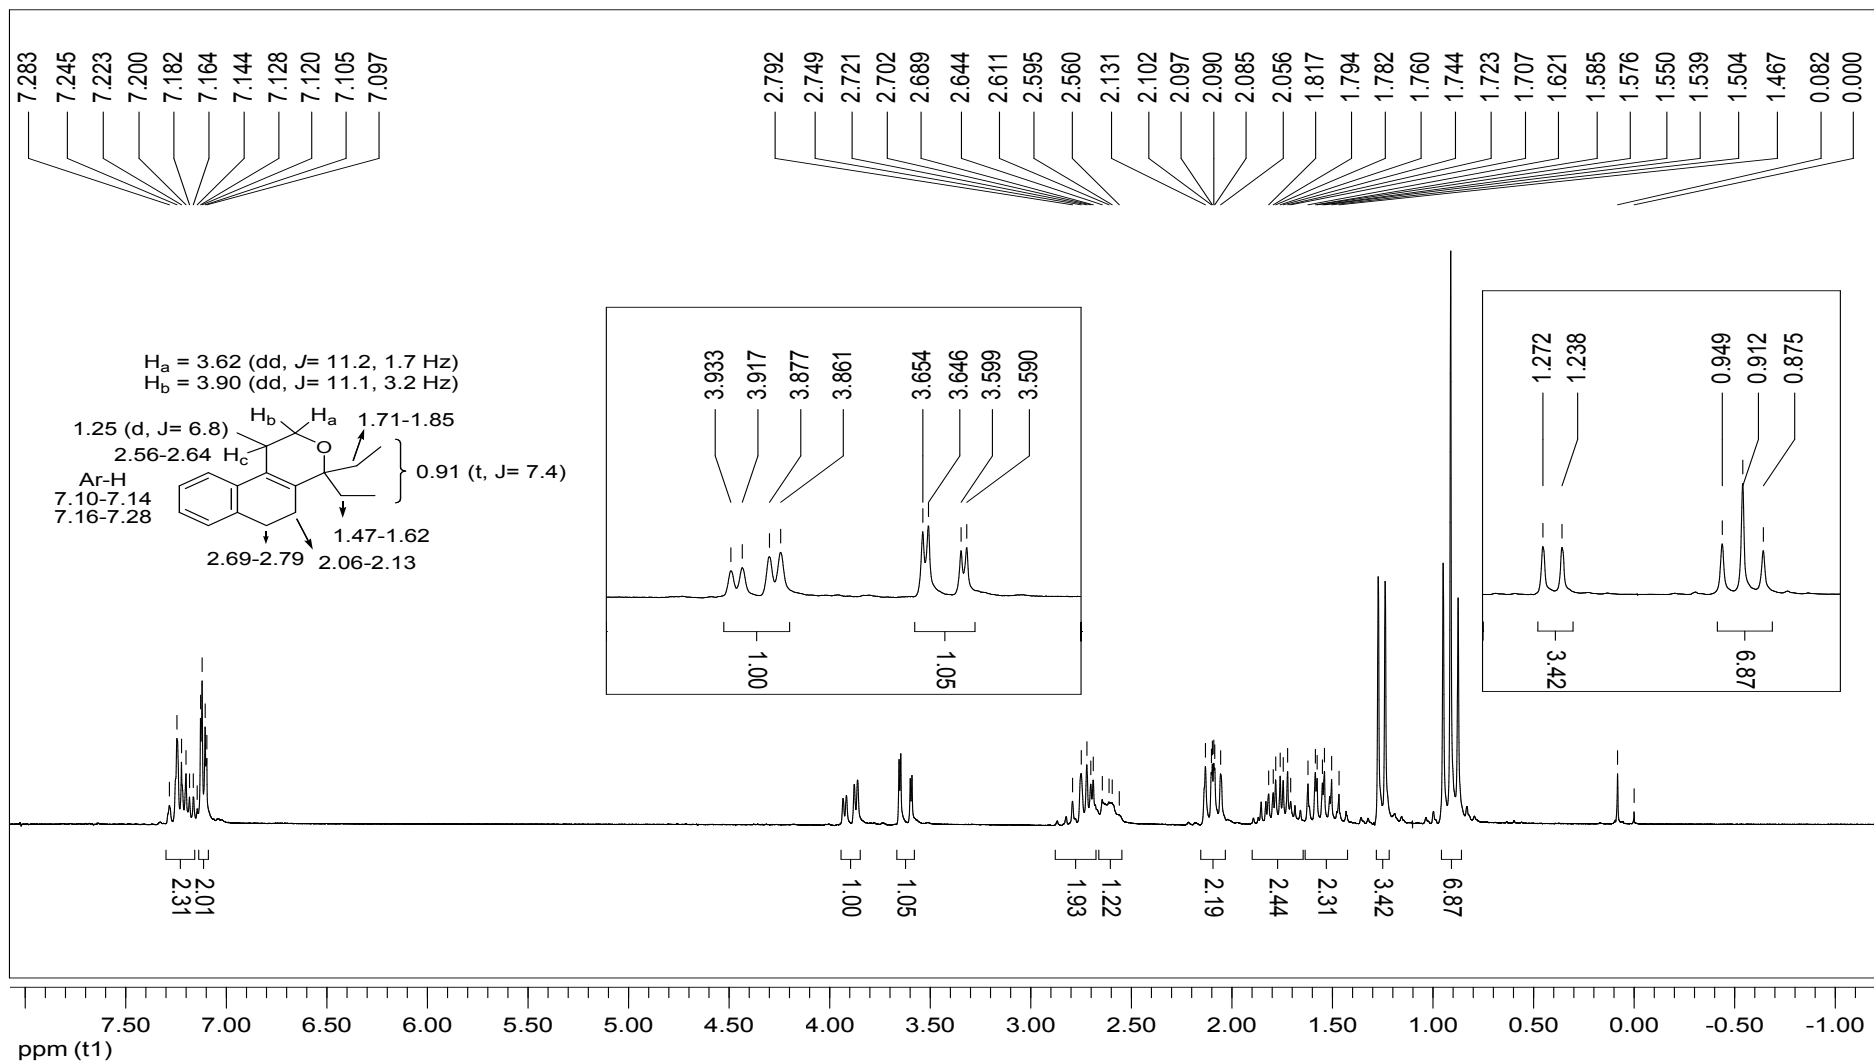

$^1\text{H}$  NMR (200 MHz,  $\text{CDCl}_3$ ) spectrum of **3**

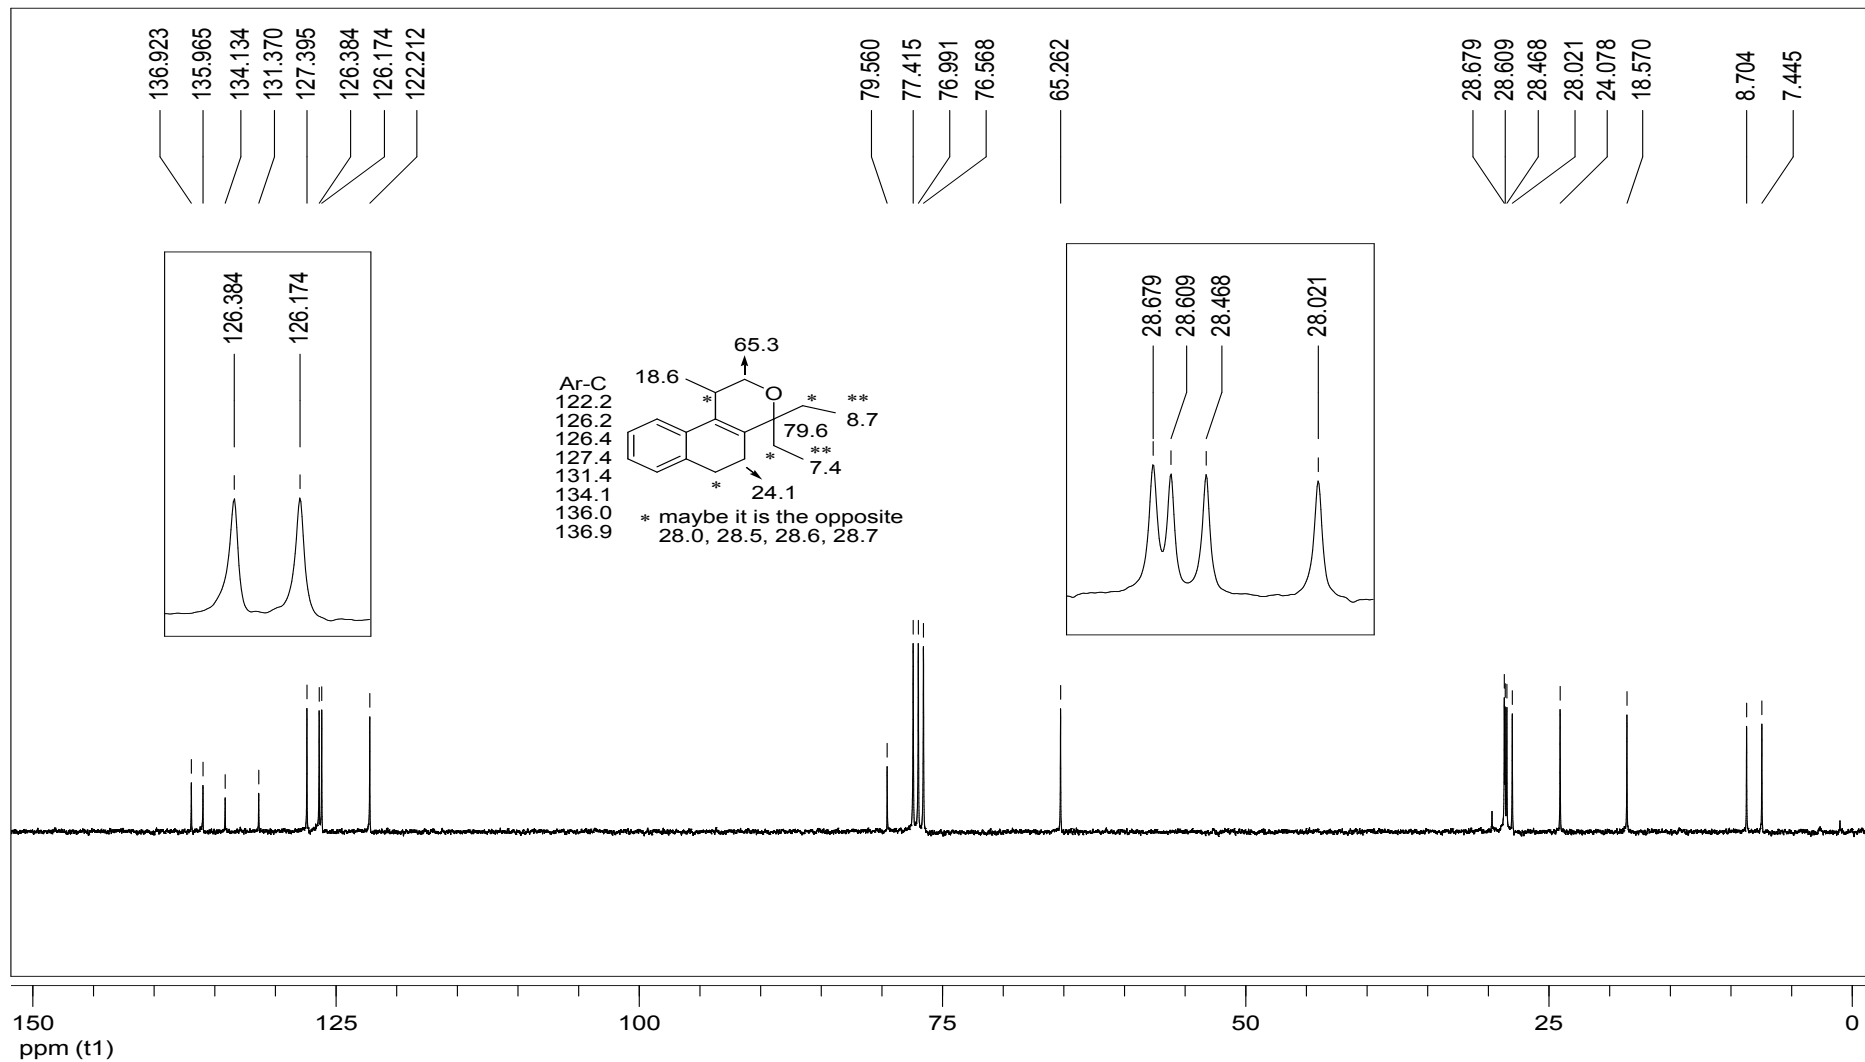

<sup>13</sup>C NMR (75 MHz, CDCl<sub>3</sub>) spectrum of **3**

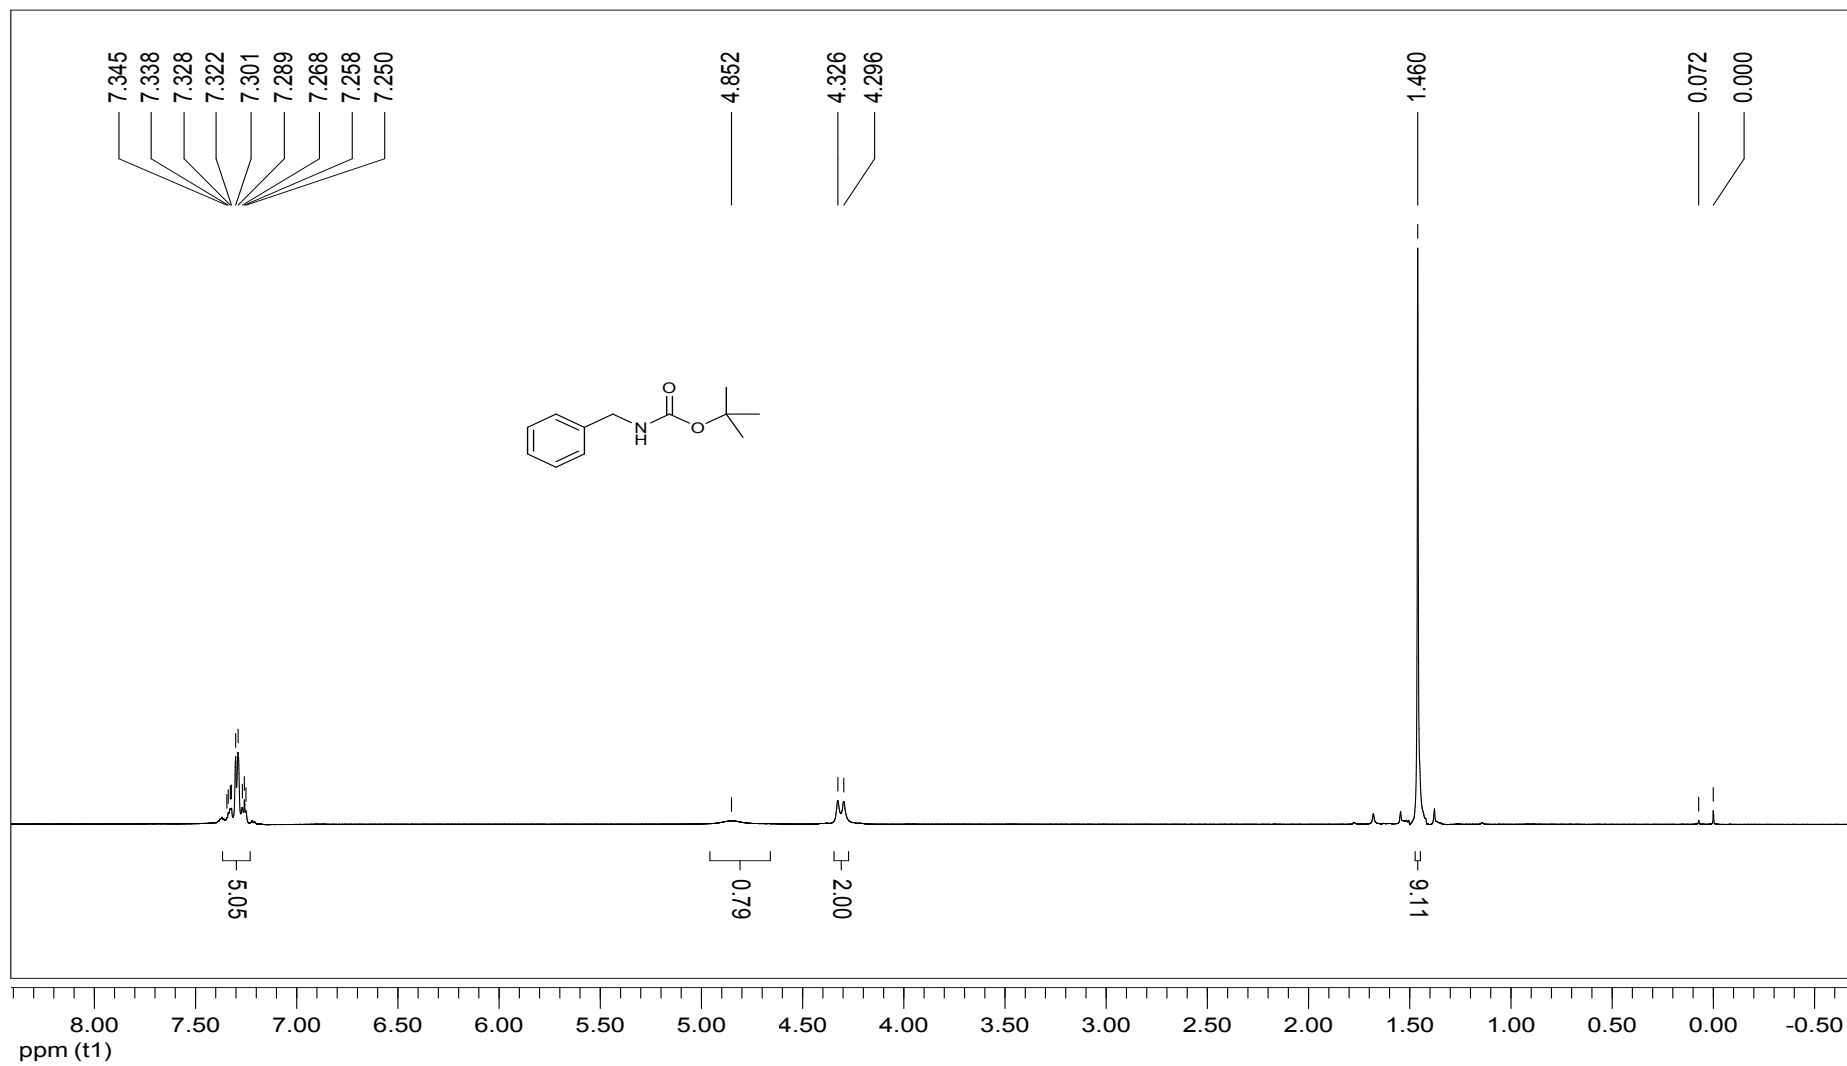

$^1\text{H}$  NMR (200 MHz,  $\text{CDCl}_3$ ) spectrum of **5**

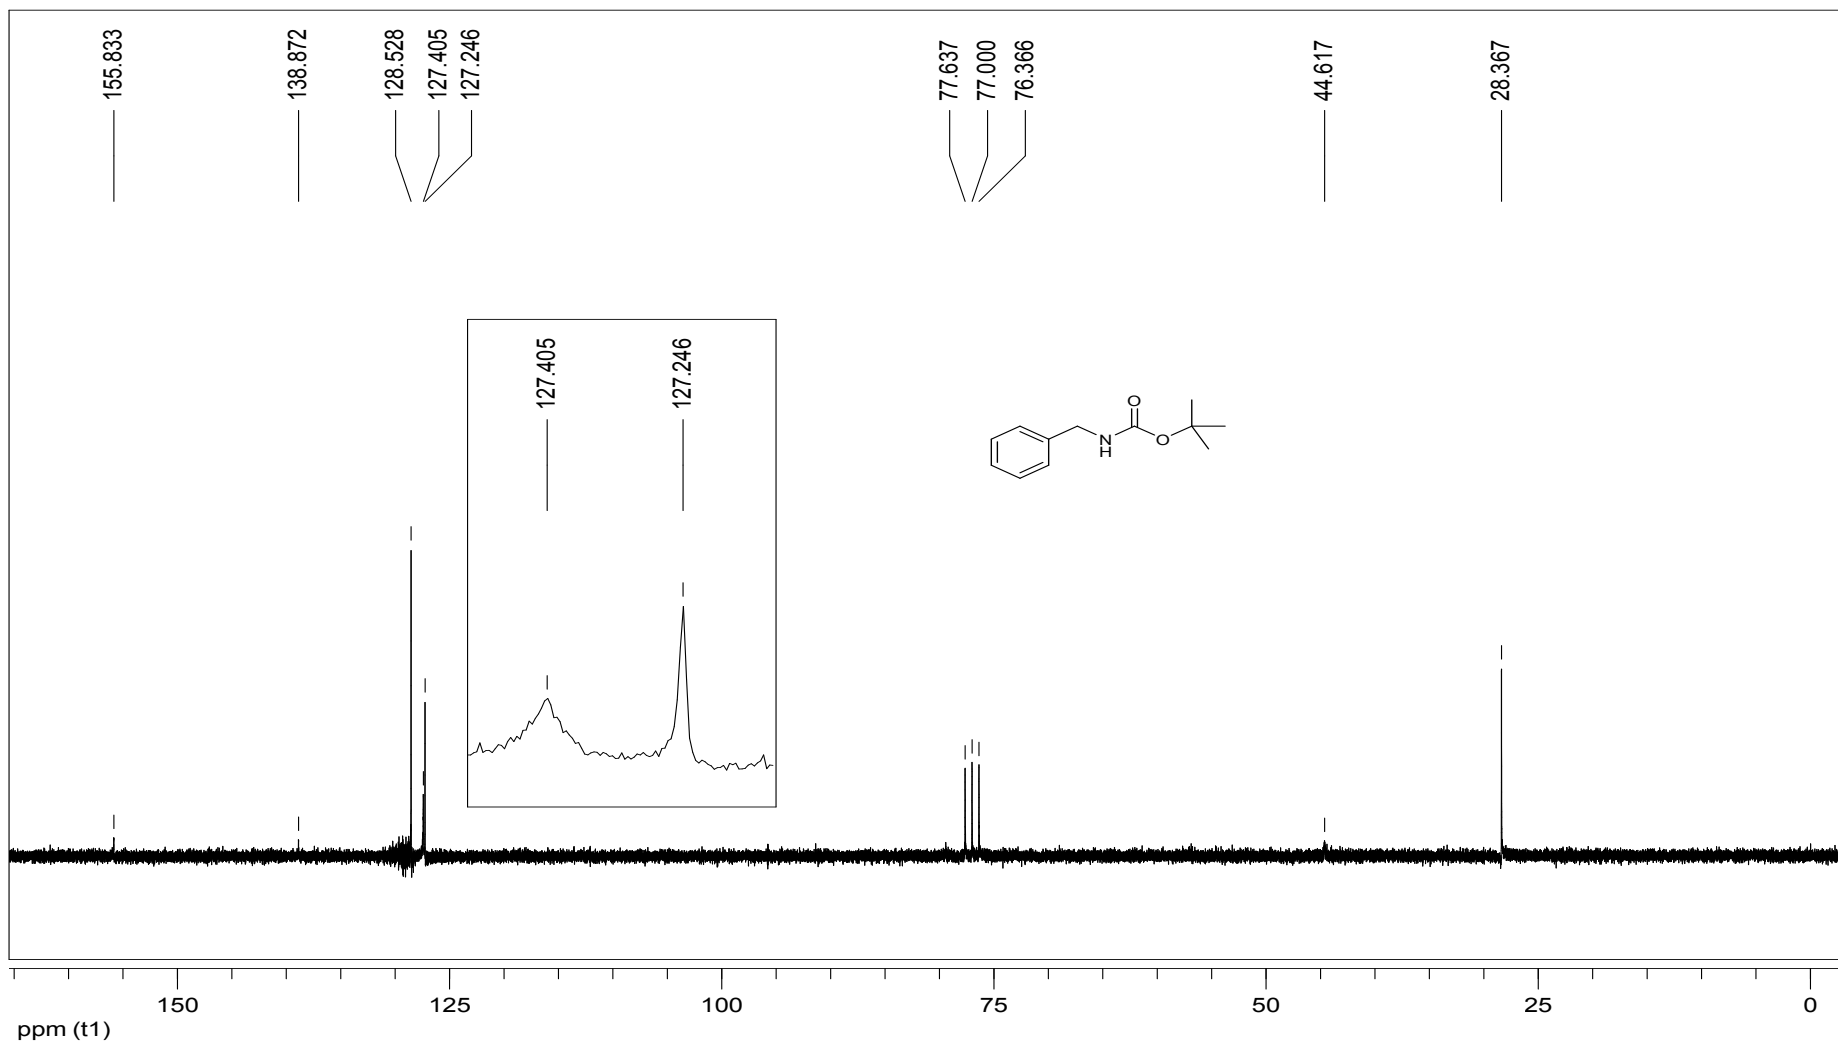

$^{13}\text{C}$  NMR (50 MHz,  $\text{CDCl}_3$ ) spectrum of **5**

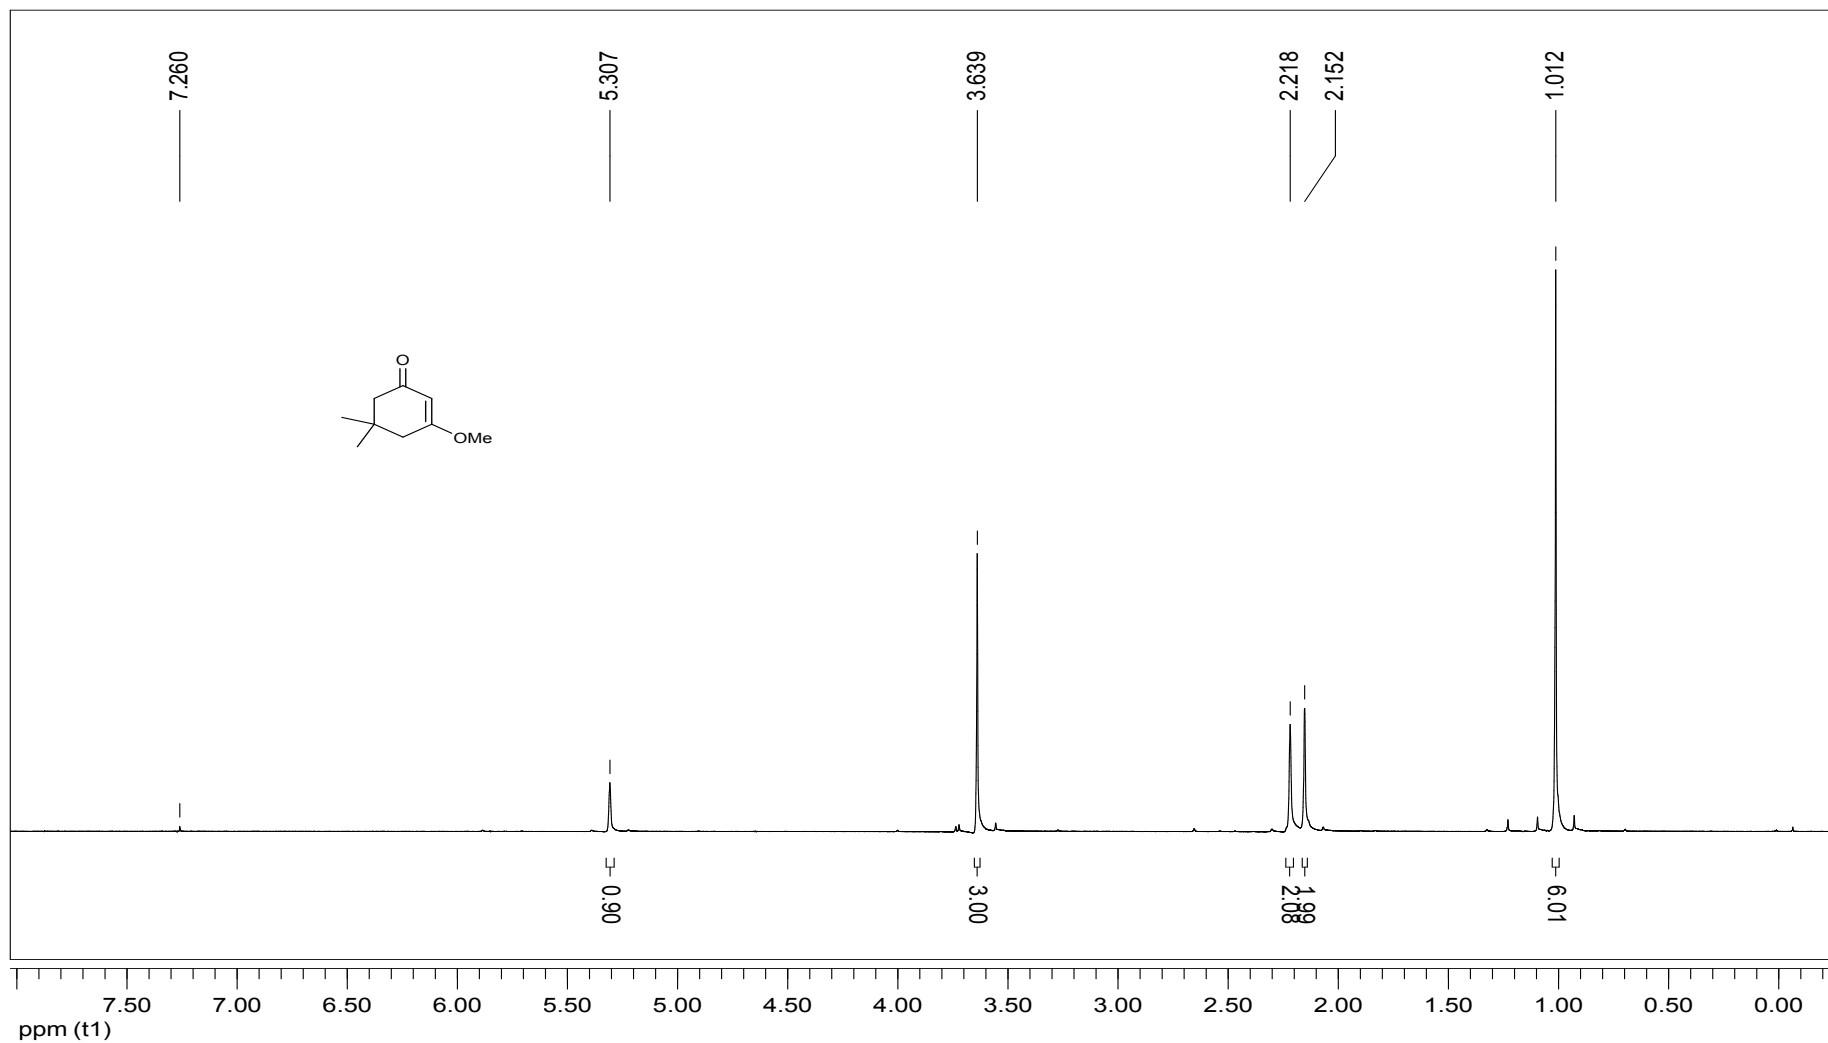

<sup>1</sup>H NMR (200 MHz, CDCl<sub>3</sub>) spectrum of 7

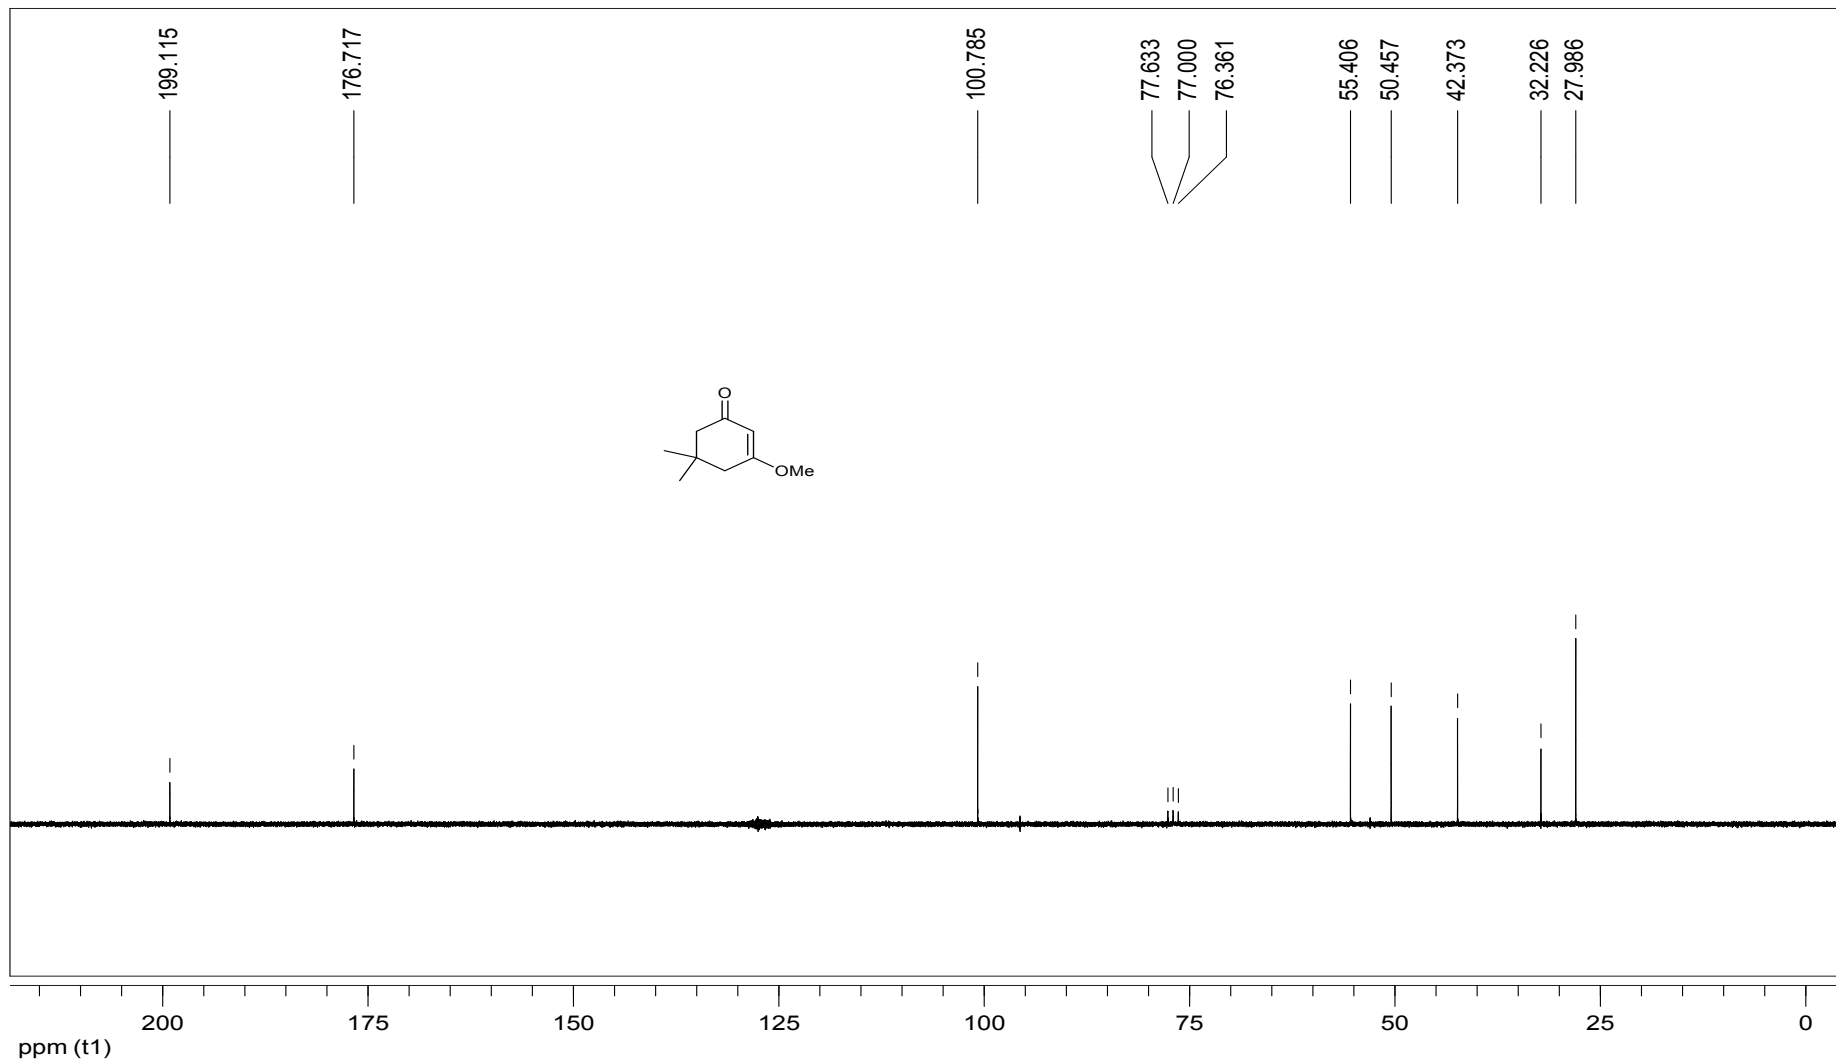

<sup>13</sup>C NMR (50 MHz, CDCl<sub>3</sub>) spectrum of 7

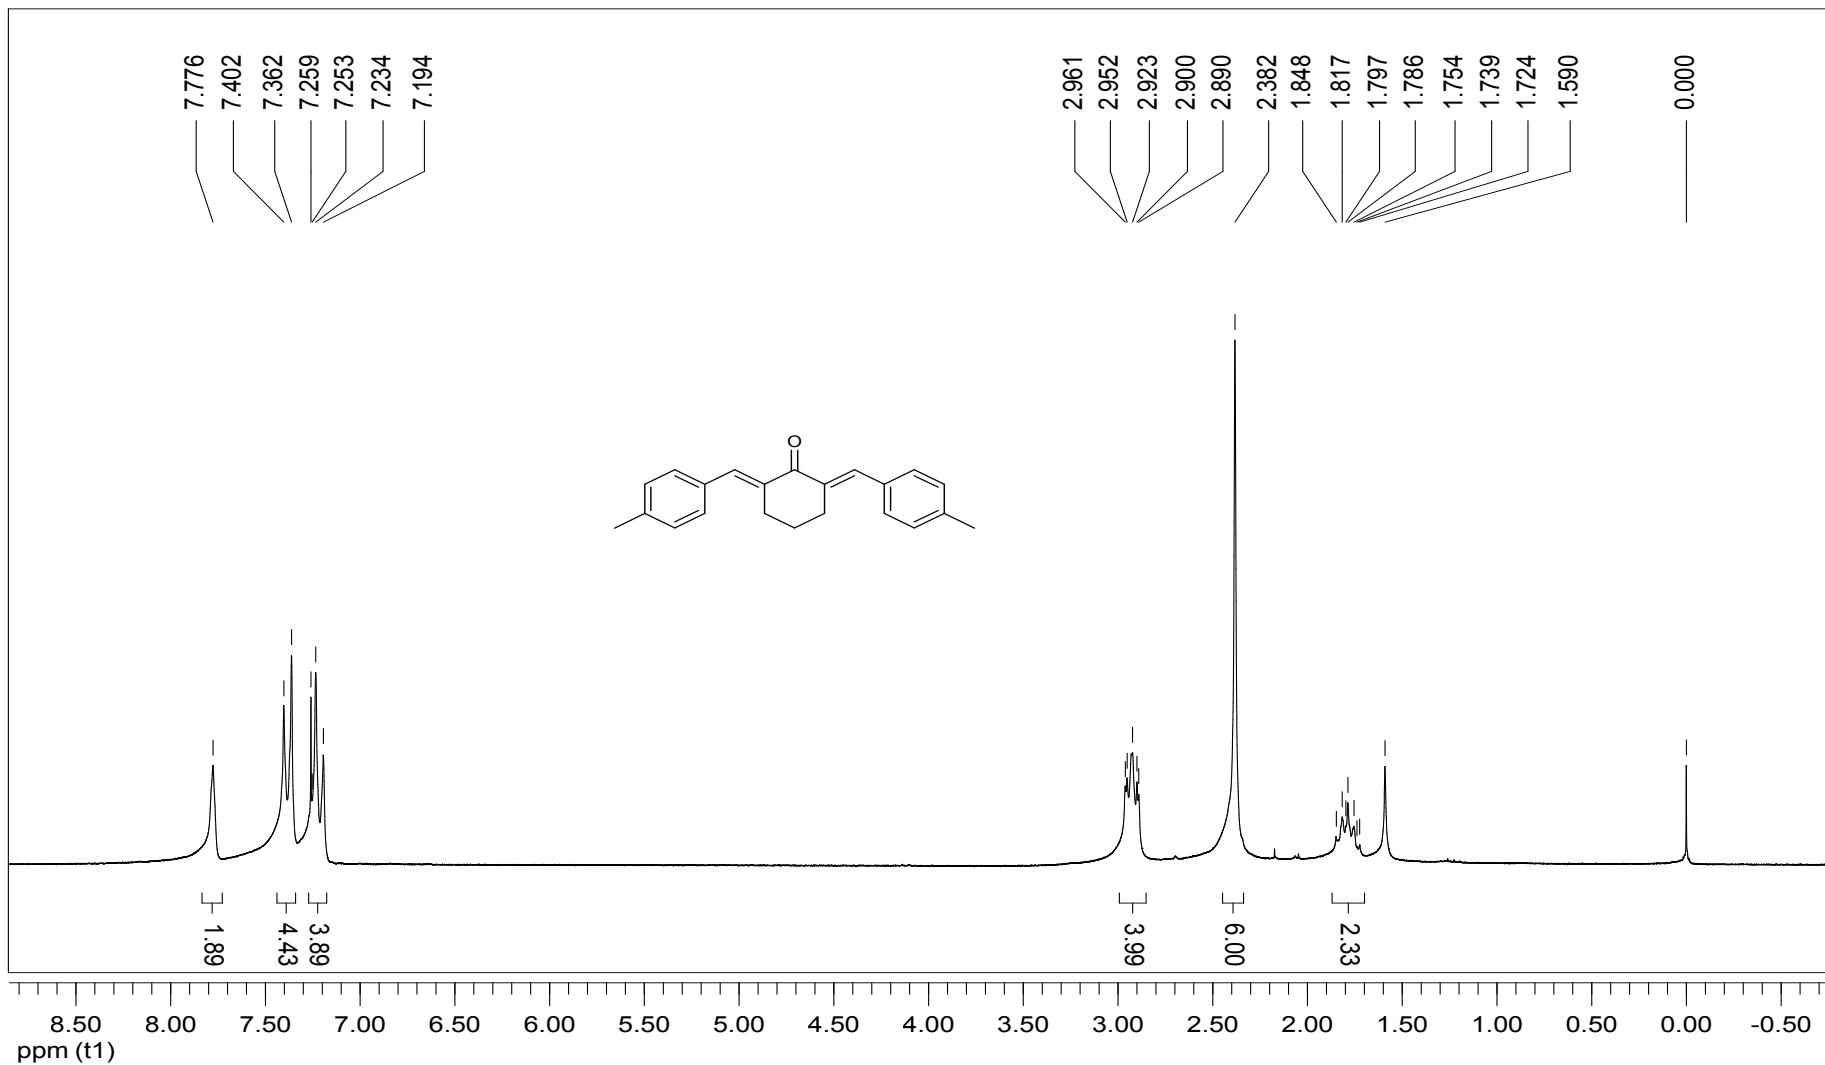

<sup>1</sup>H NMR (200 MHz, CDCl<sub>3</sub>) spectrum of **10**



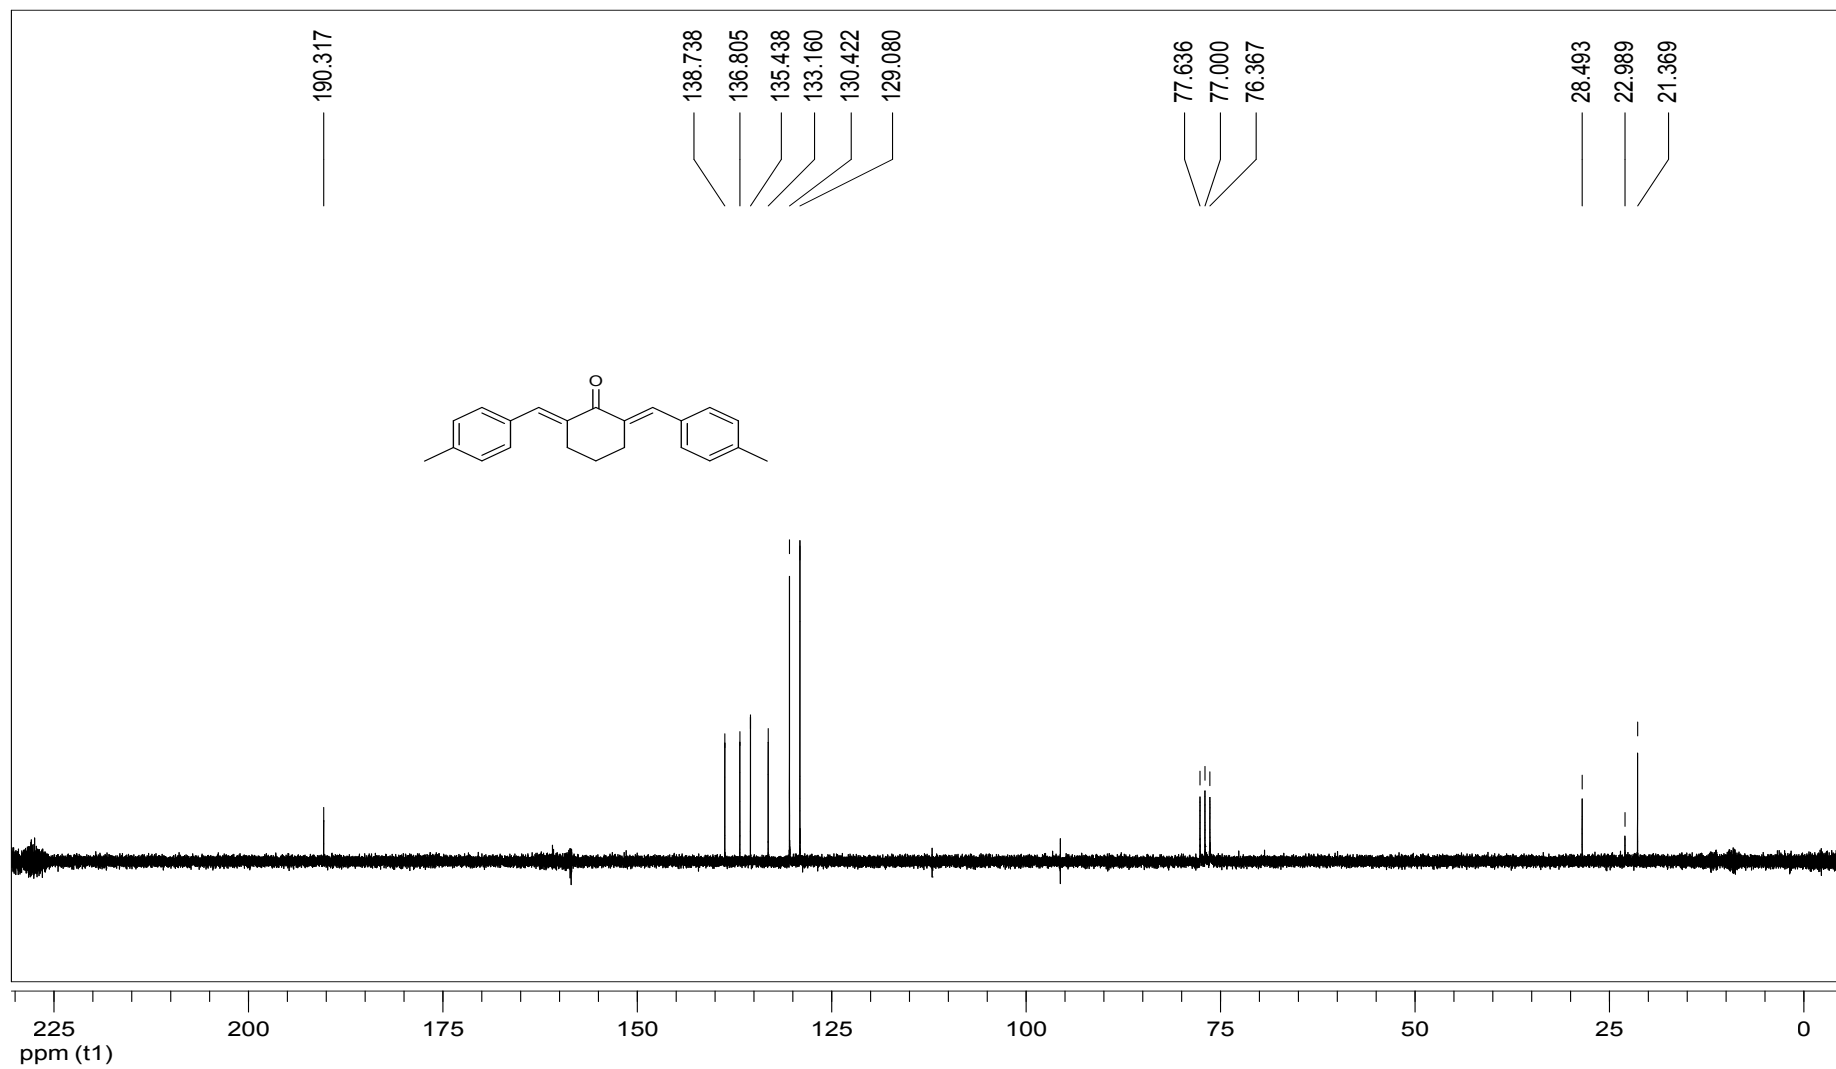

<sup>13</sup>C NMR (50 MHz, CDCl<sub>3</sub>) spectrum of 10

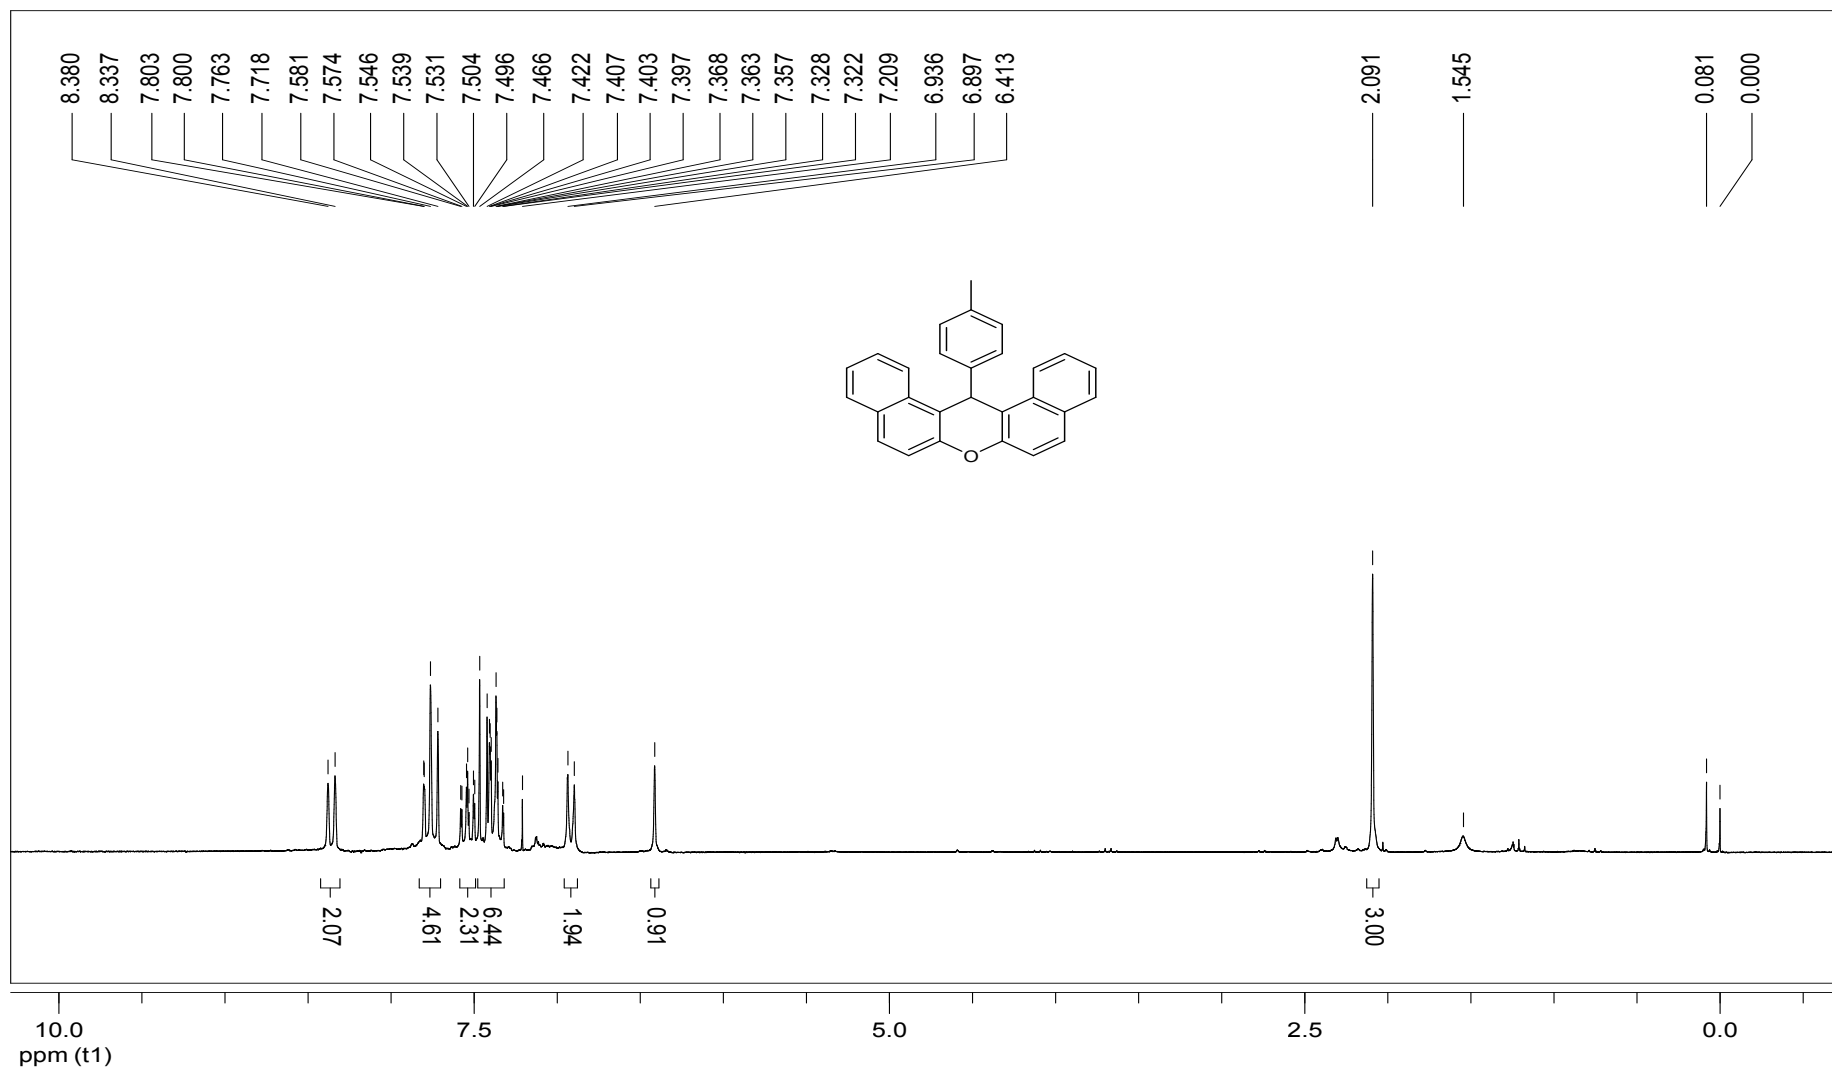

<sup>1</sup>H NMR (200 MHz, CDCl<sub>3</sub>) spectrum of **12**

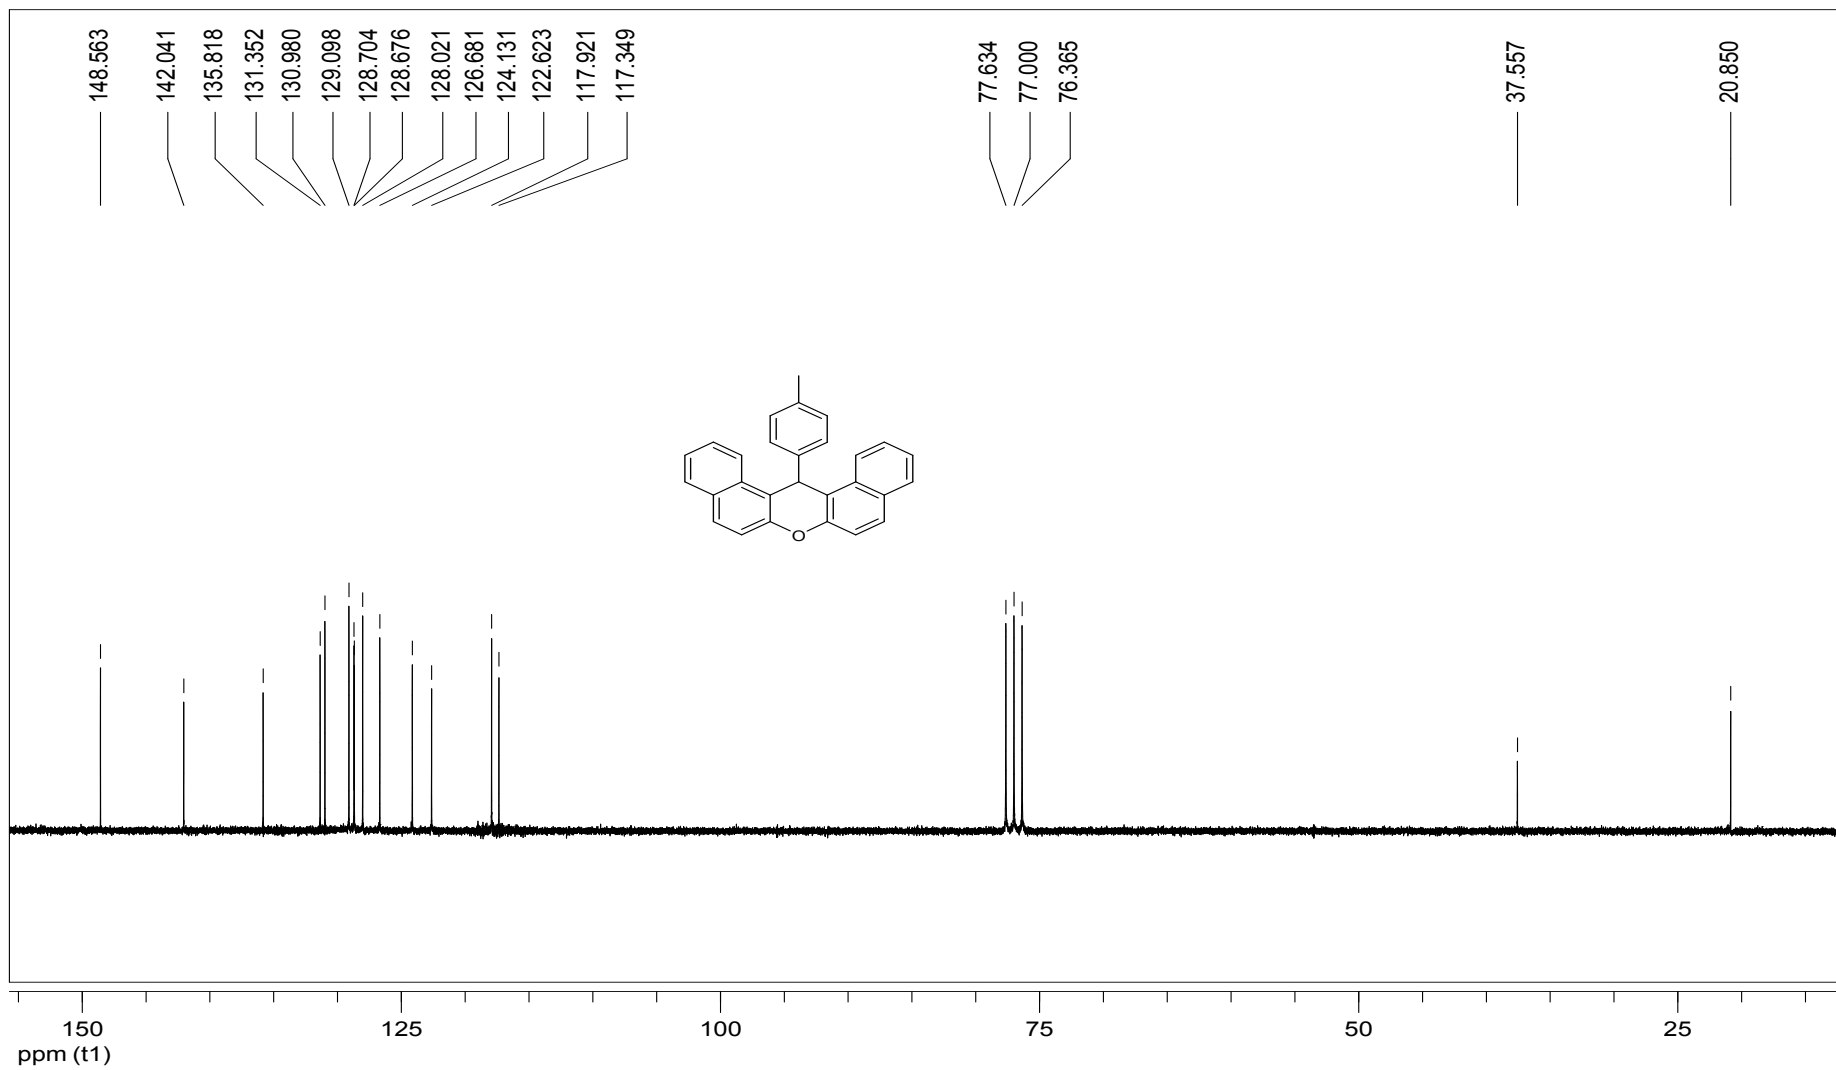

$^{13}\text{C}$  NMR (50 MHz,  $\text{CDCl}_3$ ) spectrum of **12**

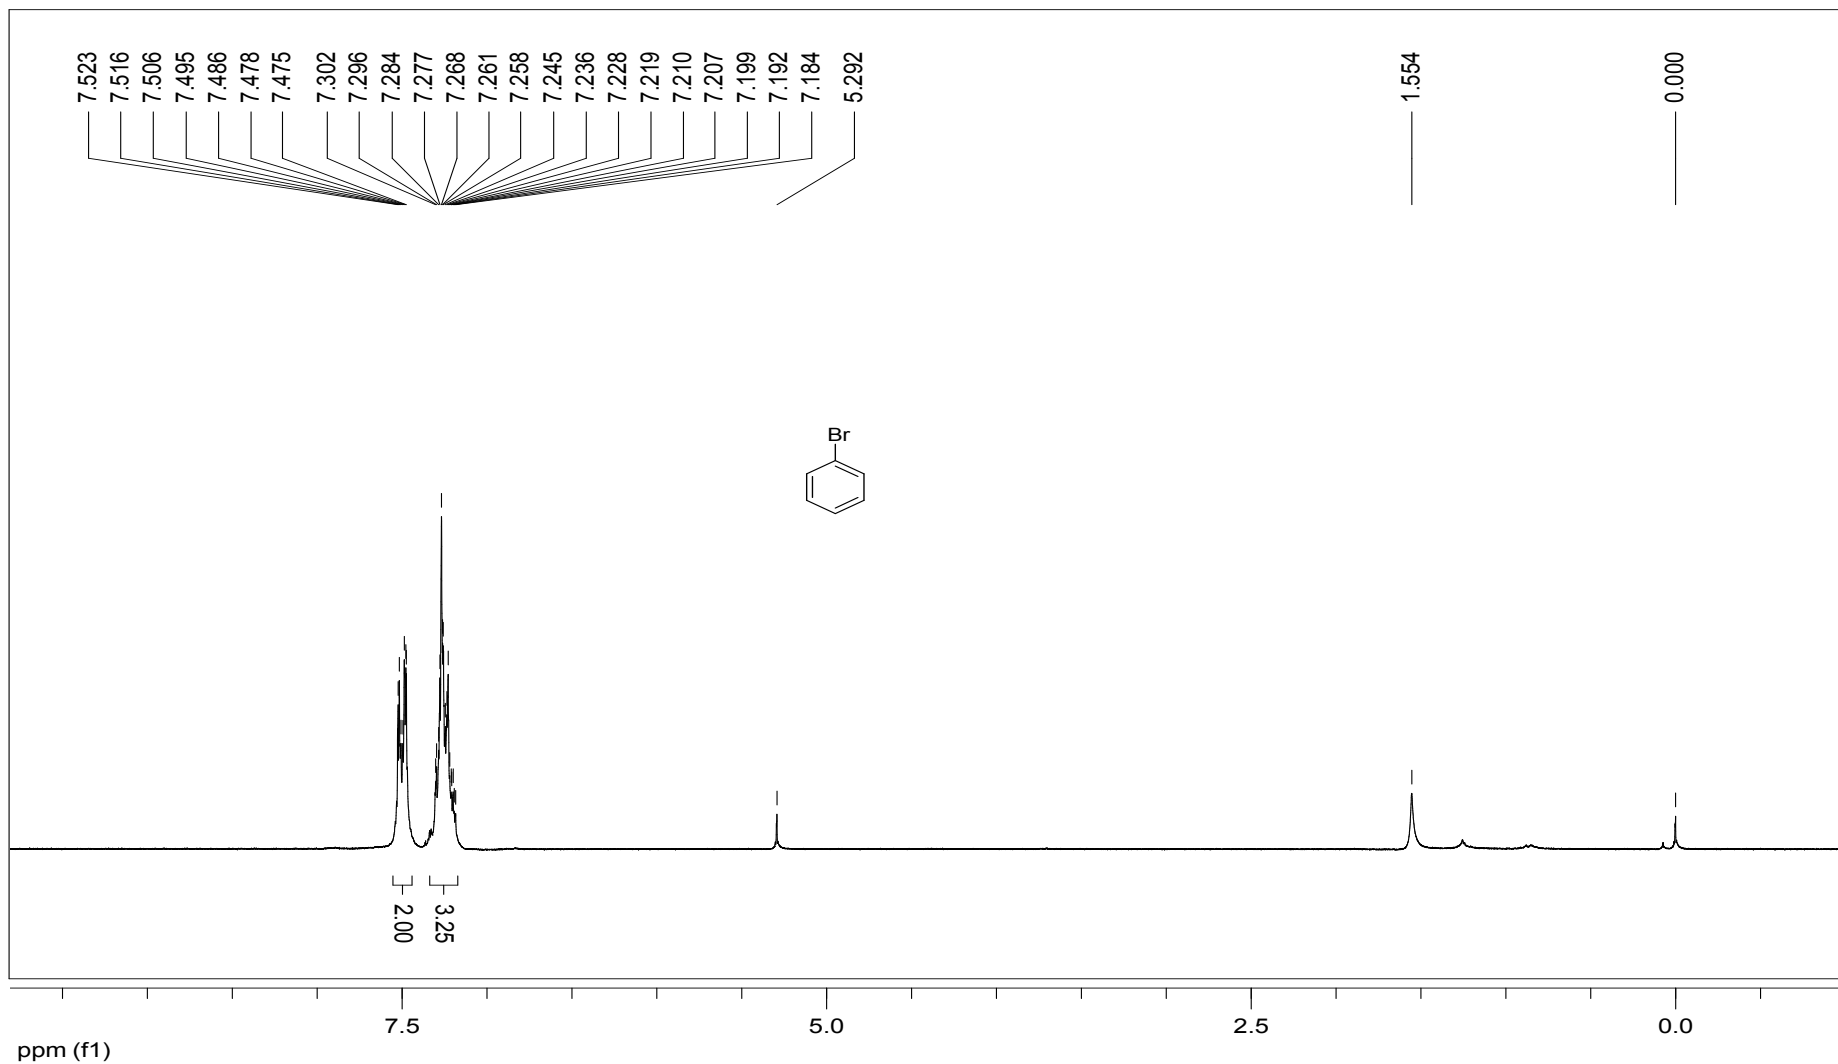

<sup>1</sup>H NMR (200 MHz, CDCl<sub>3</sub>) spectrum of **14**

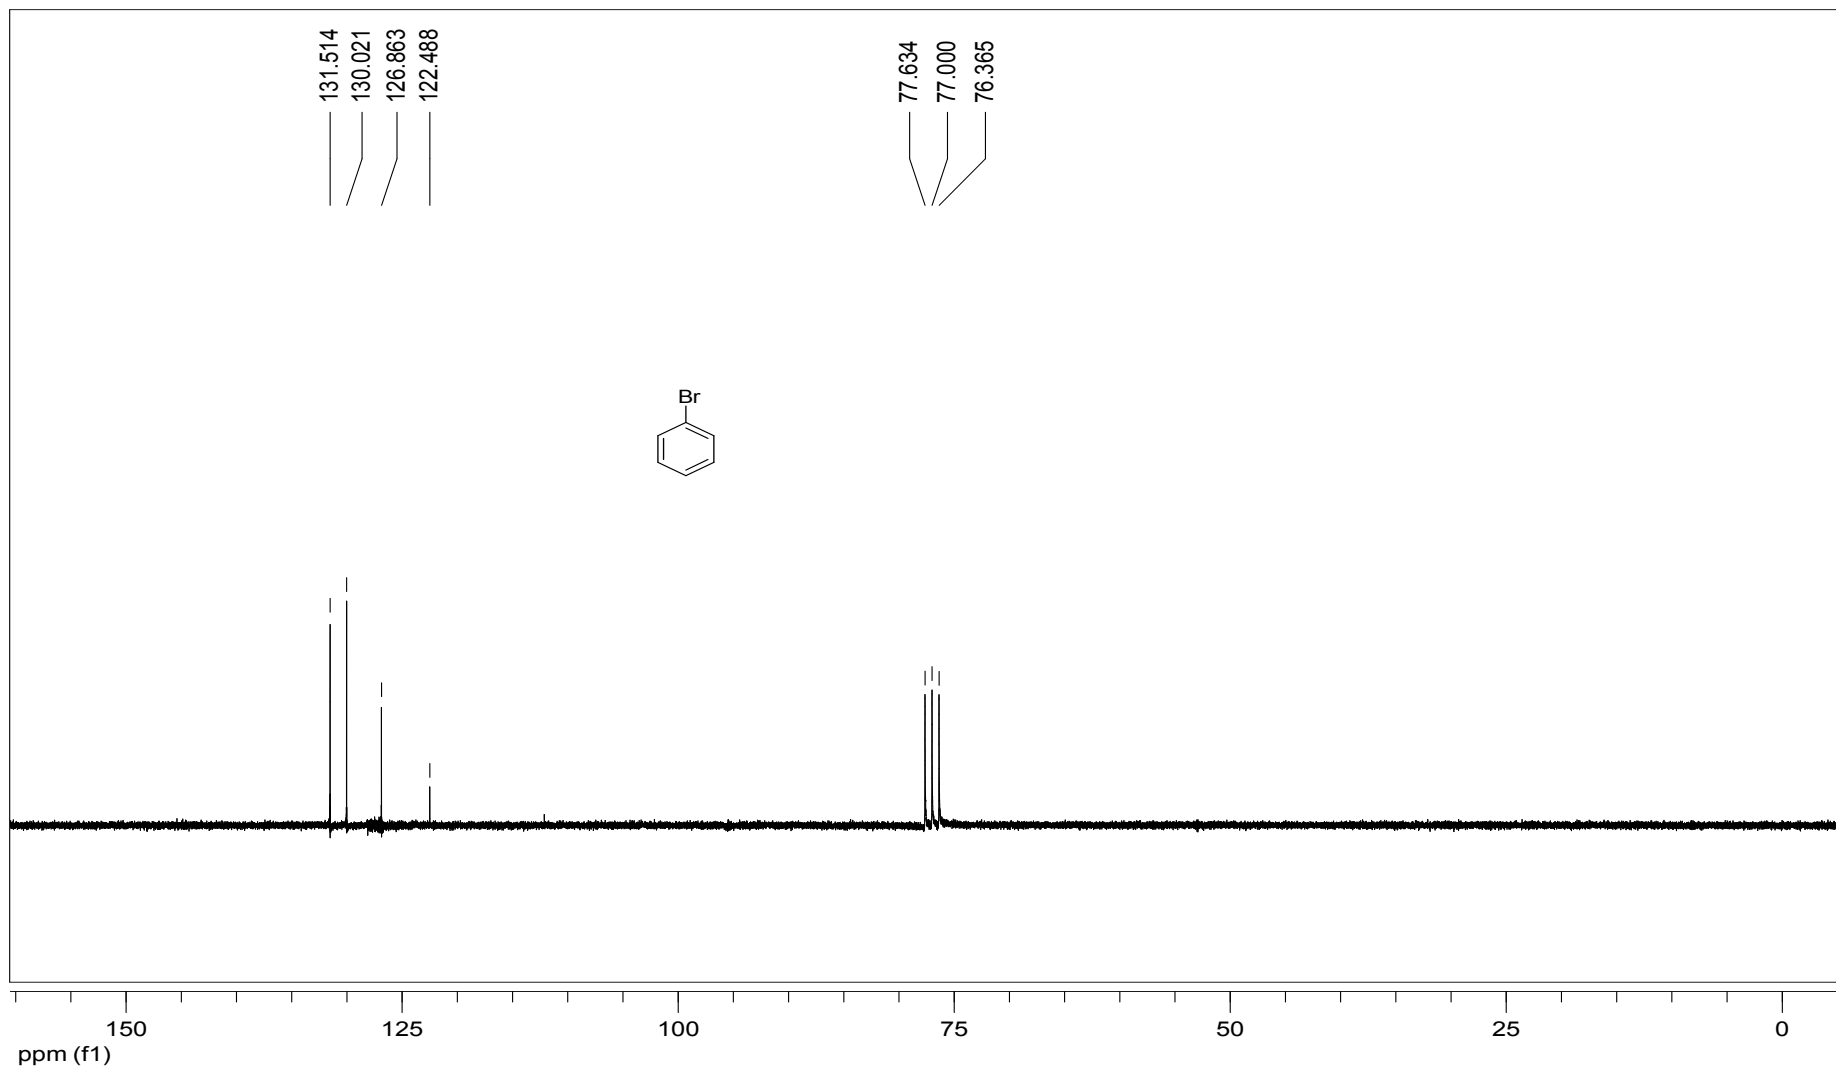

$^{13}\text{C}$  NMR (50 MHz,  $\text{CDCl}_3$ ) spectrum of 14

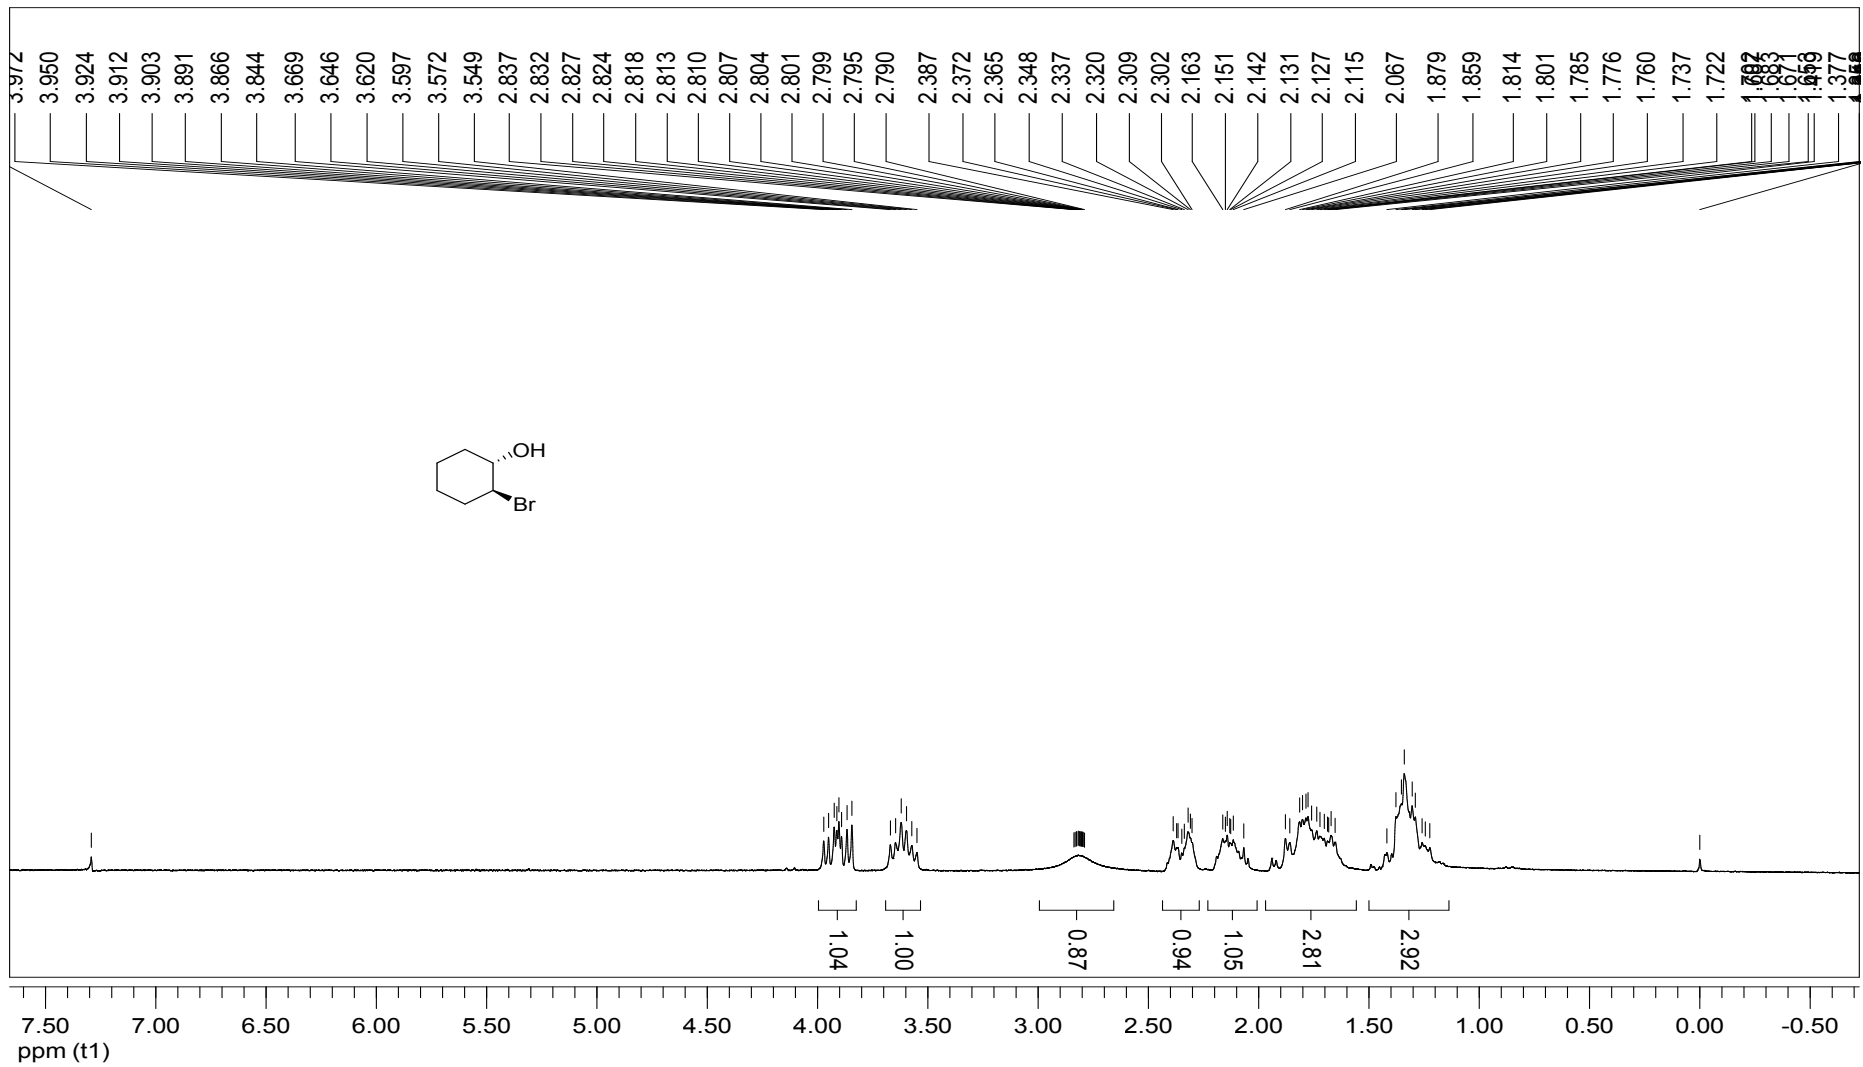

<sup>1</sup>H NMR (200 MHz, CDCl<sub>3</sub>) spectrum of 16

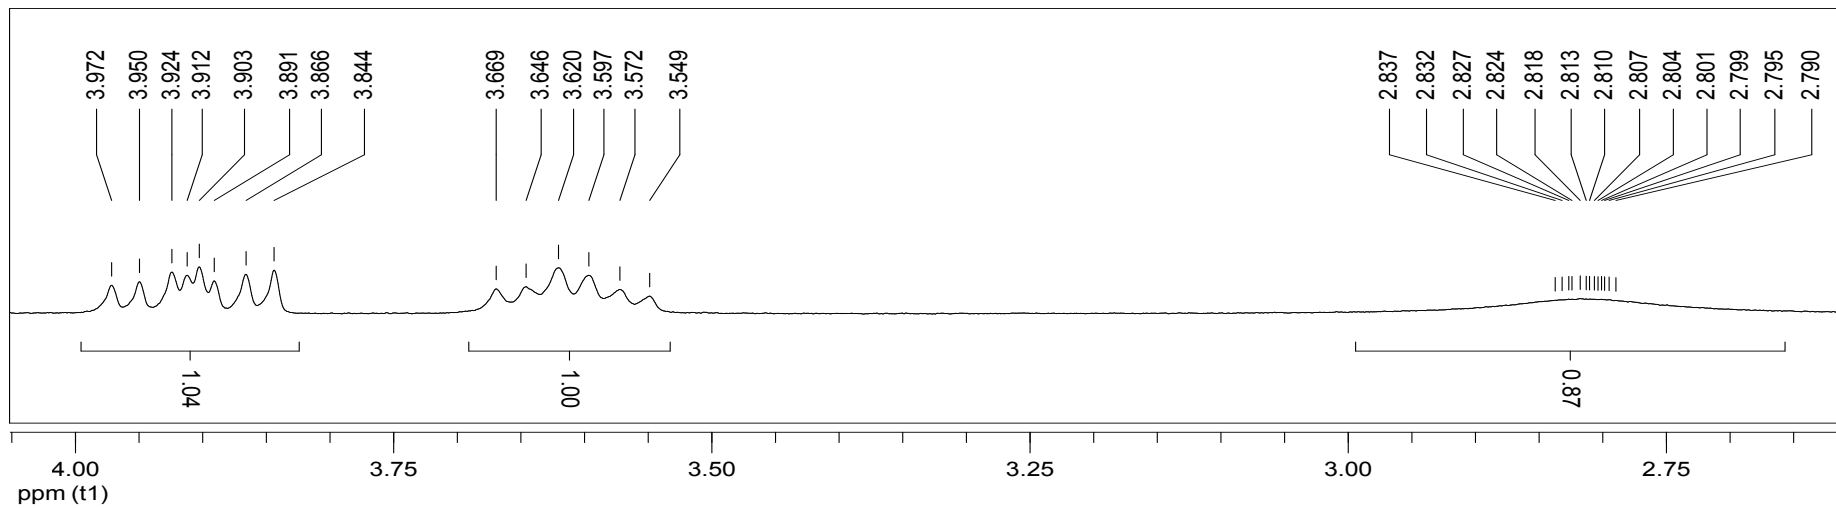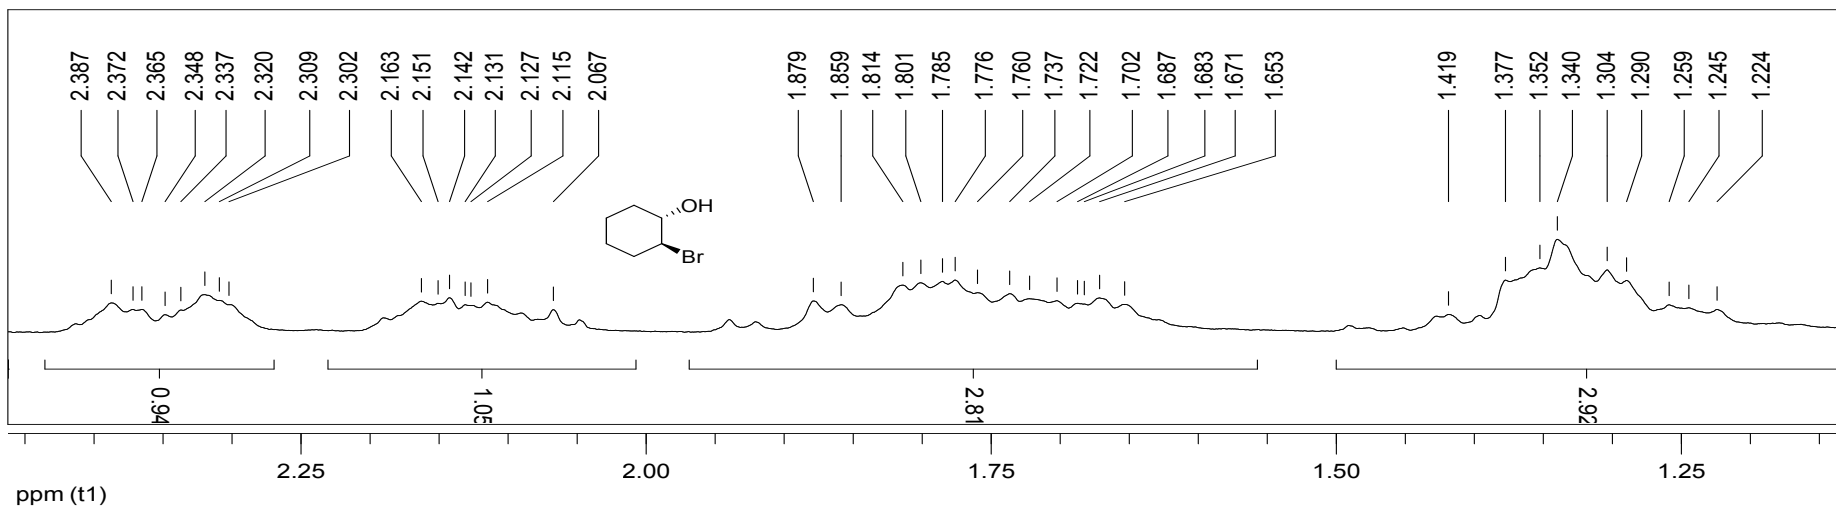

<sup>1</sup>H NMR (200 MHz, CDCl<sub>3</sub>) selected expansions of **16**

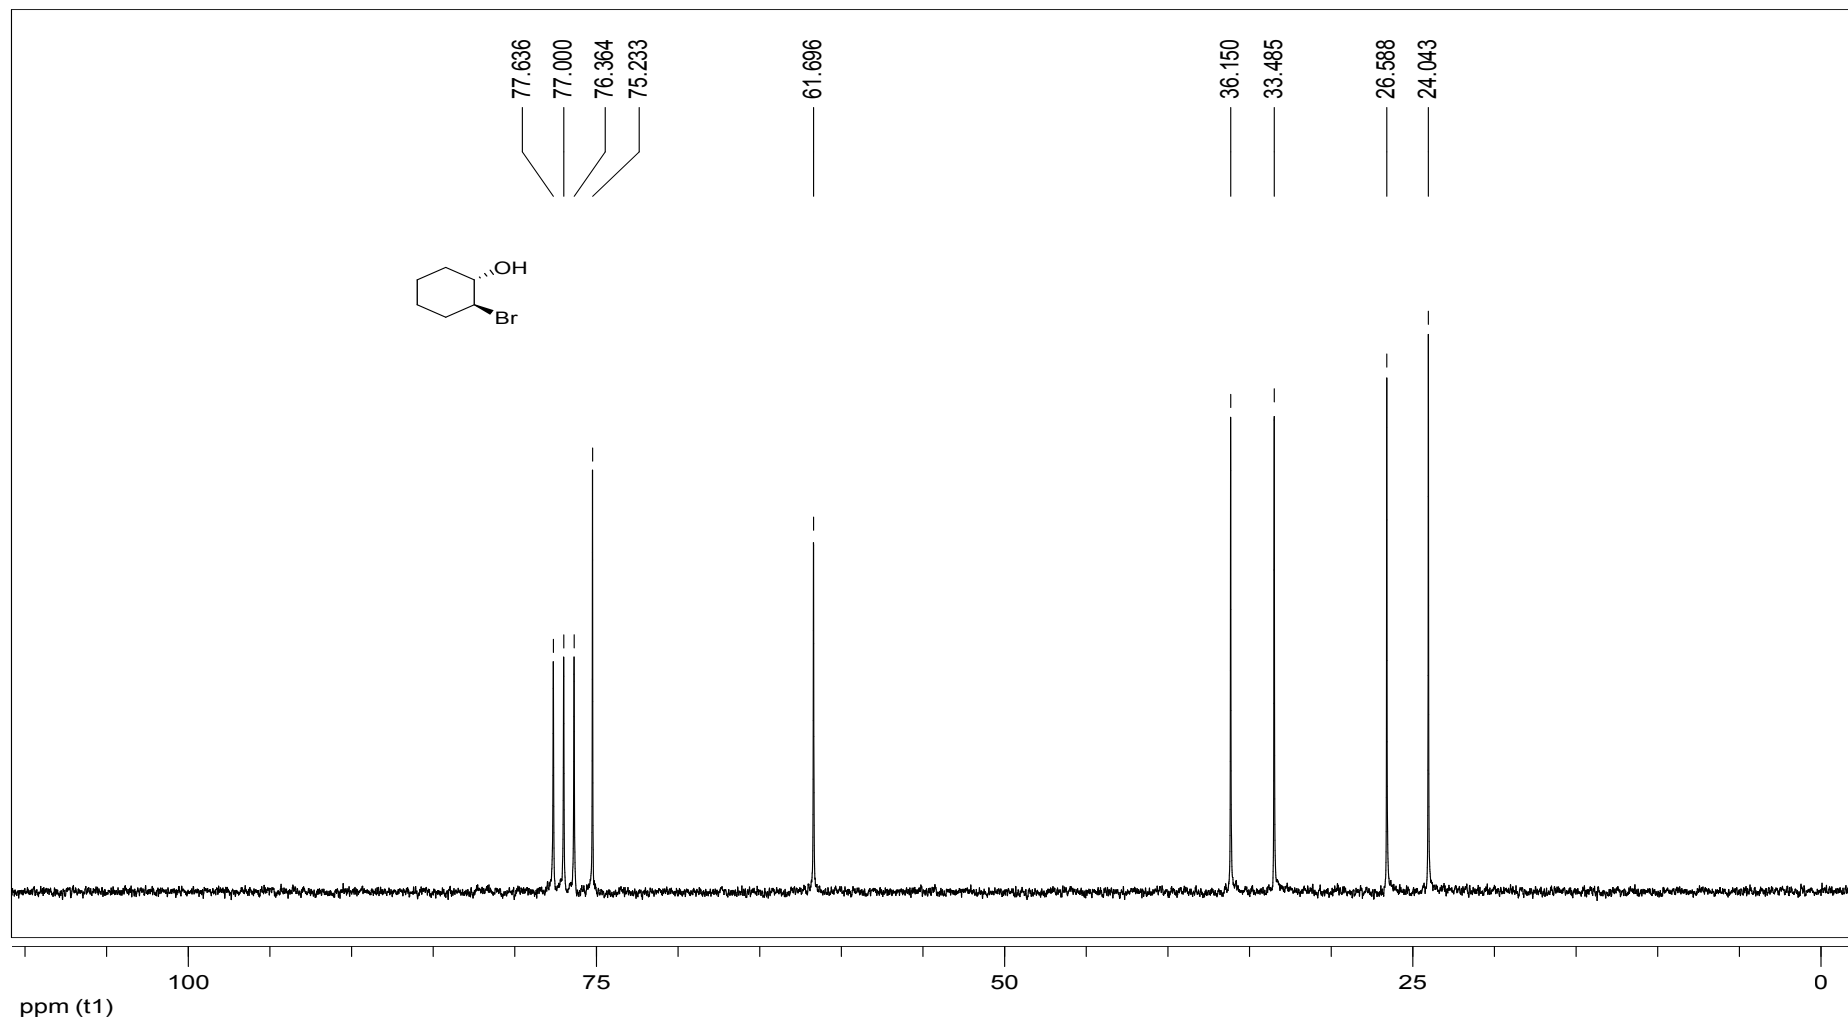

$^{13}\text{C}$  NMR (50 MHz,  $\text{CDCl}_3$ ) spectrum of **16**



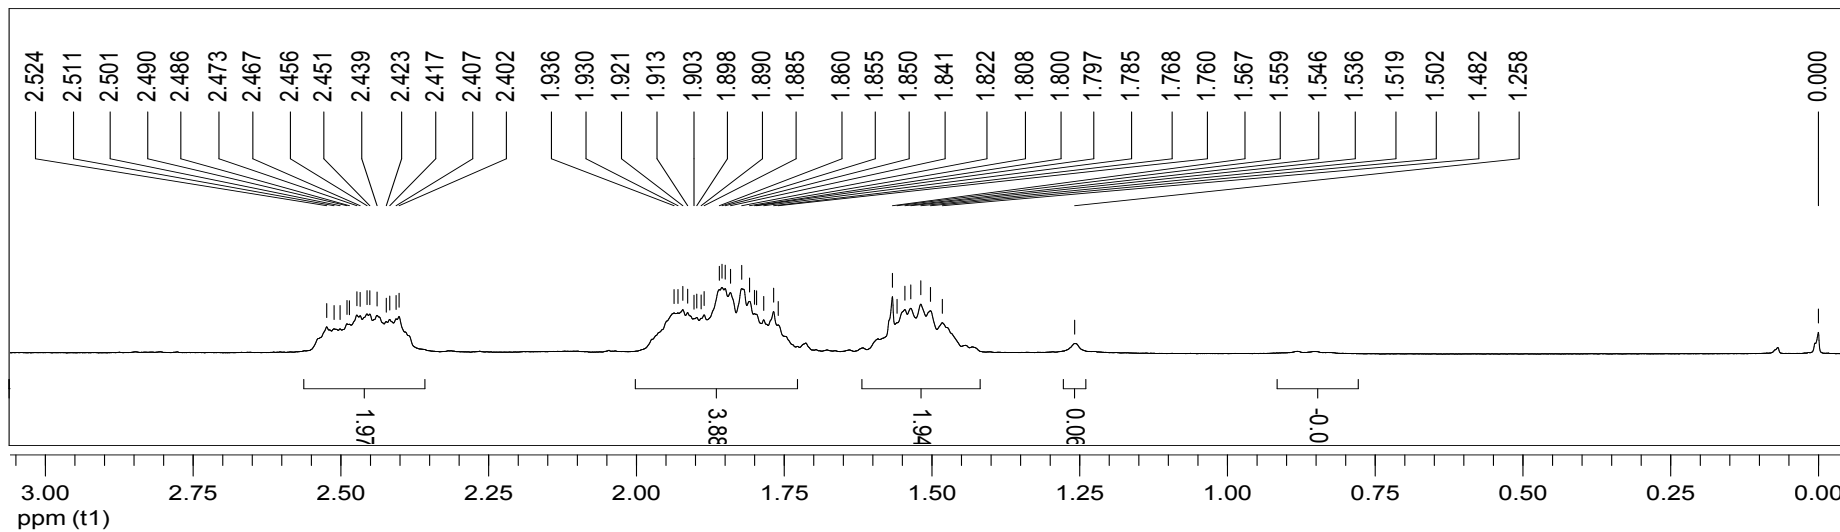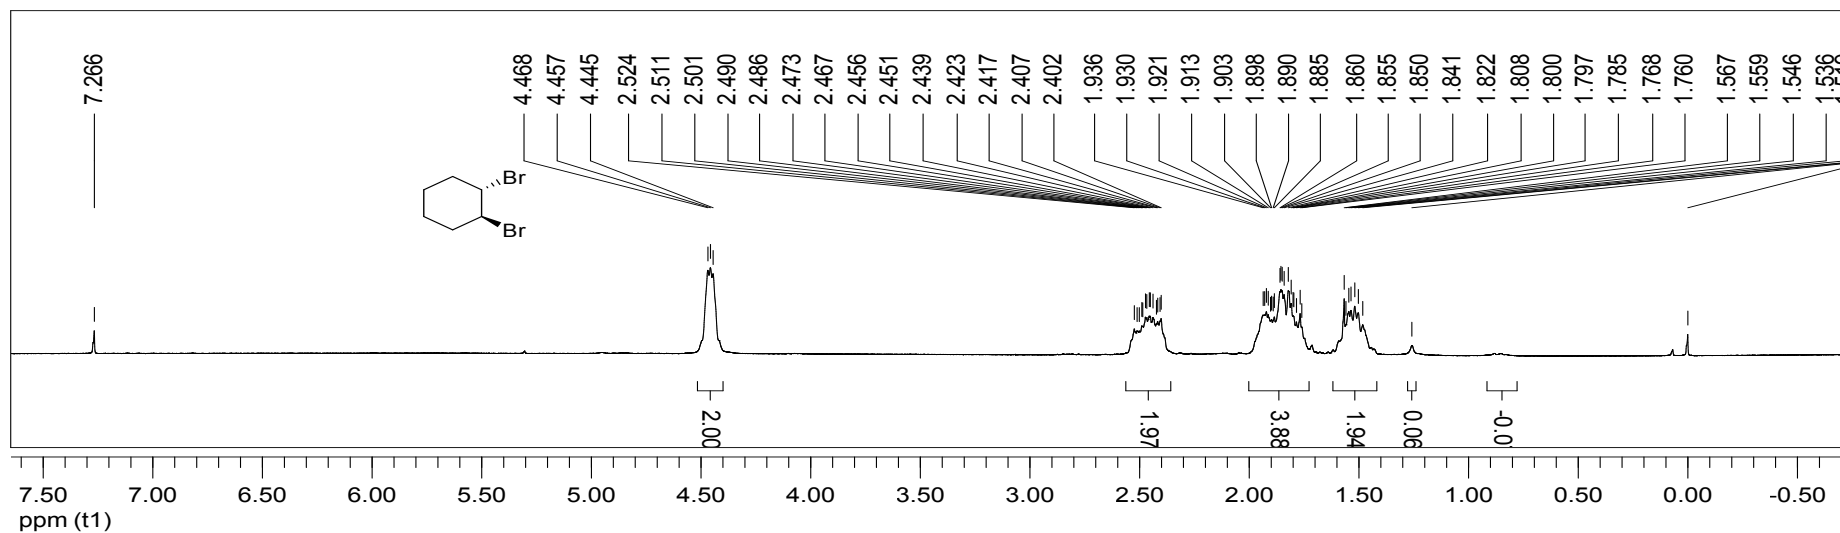

<sup>1</sup>H NMR (200 MHz, CDCl<sub>3</sub>) spectrum of 17

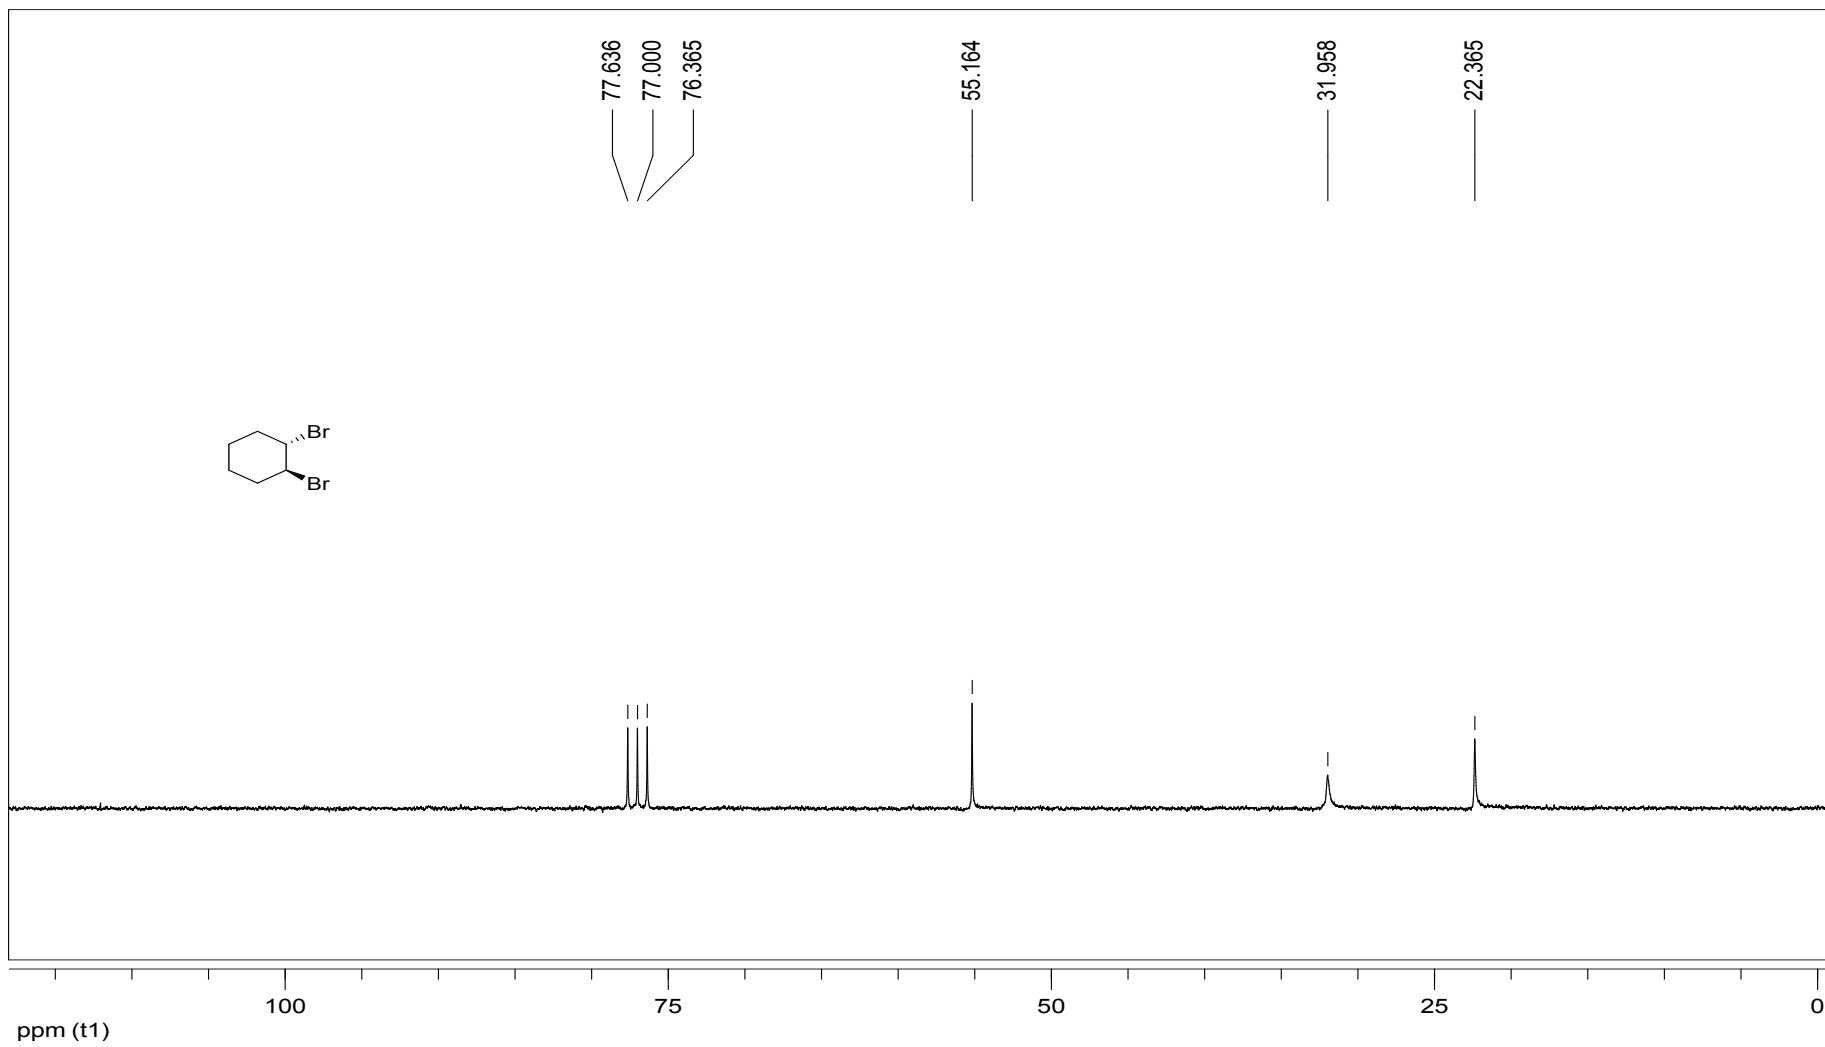

$^{13}\text{C}$  NMR (50 MHz,  $\text{CDCl}_3$ ) spectrum of **17**

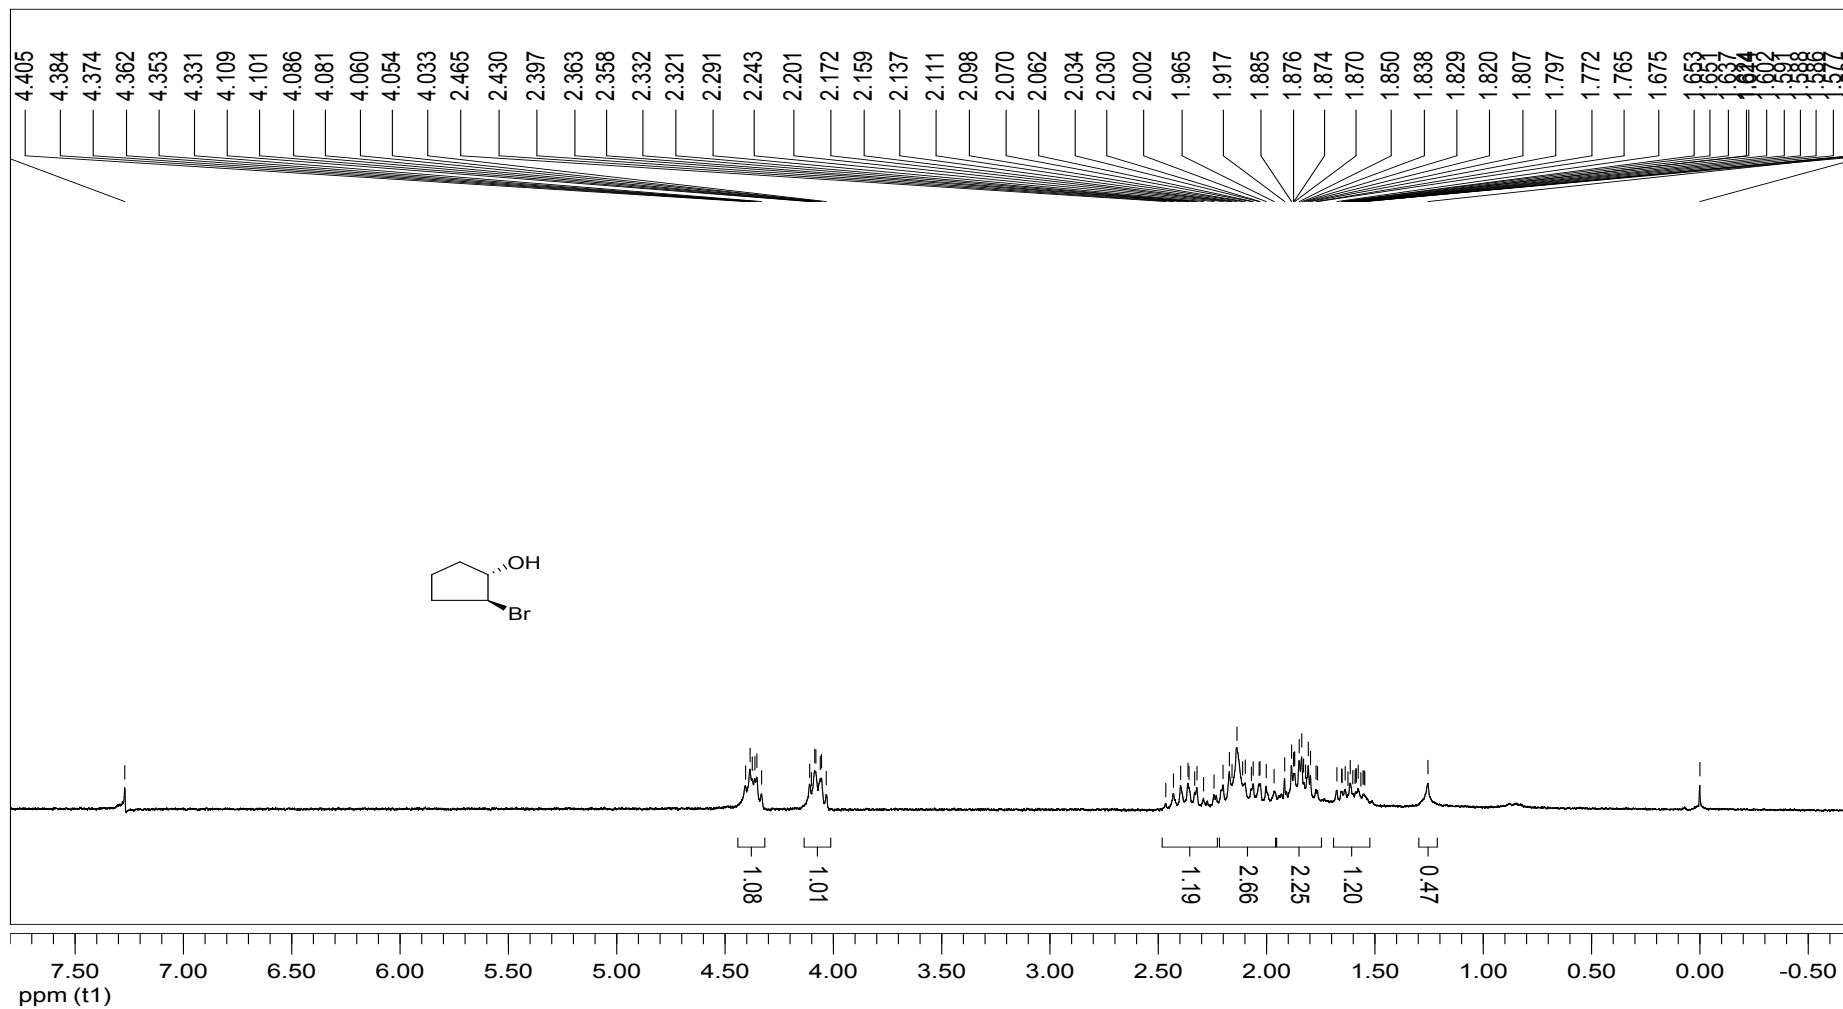

<sup>1</sup>H NMR (200 MHz, CDCl<sub>3</sub>) spectrum of **19**

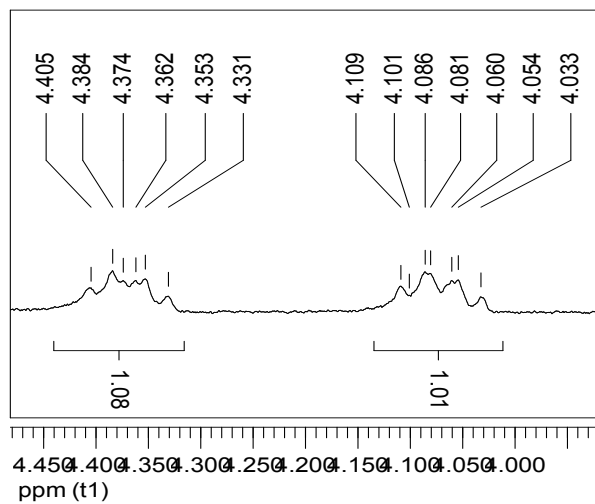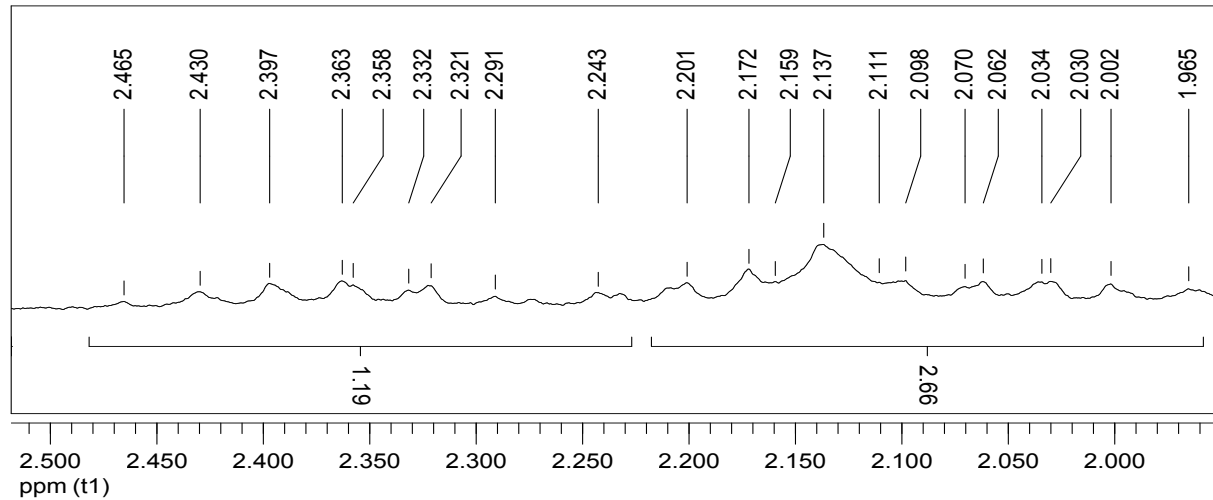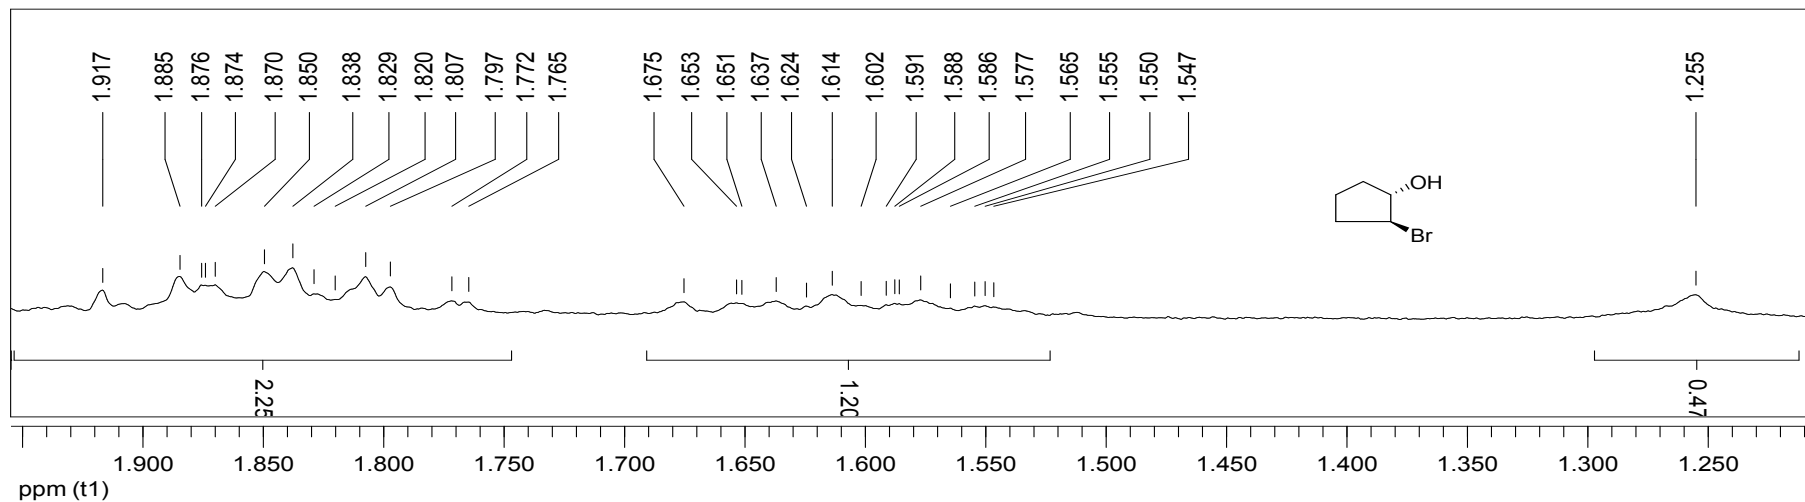

<sup>1</sup>H NMR (300 MHz, CDCl<sub>3</sub>) selected expansions of **19**

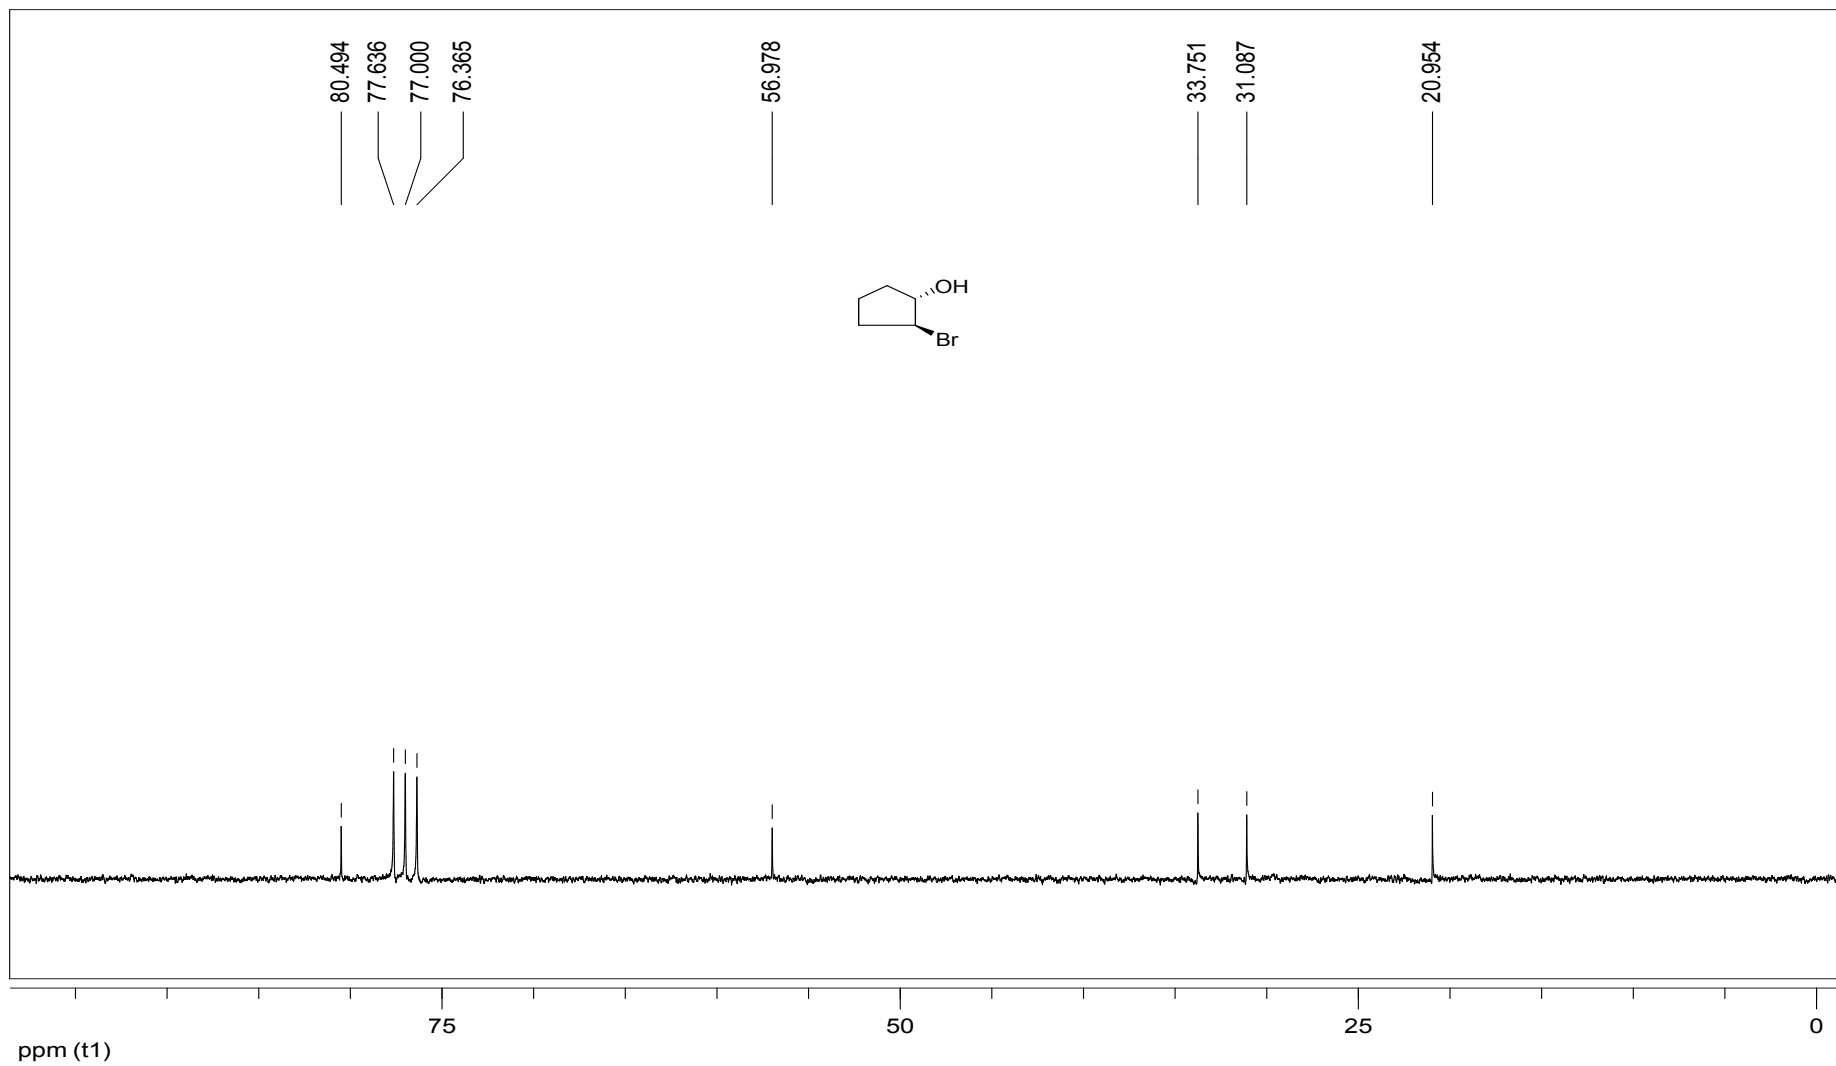

$^{13}\text{C}$  NMR (50 MHz,  $\text{CDCl}_3$ ) spectrum of **19**

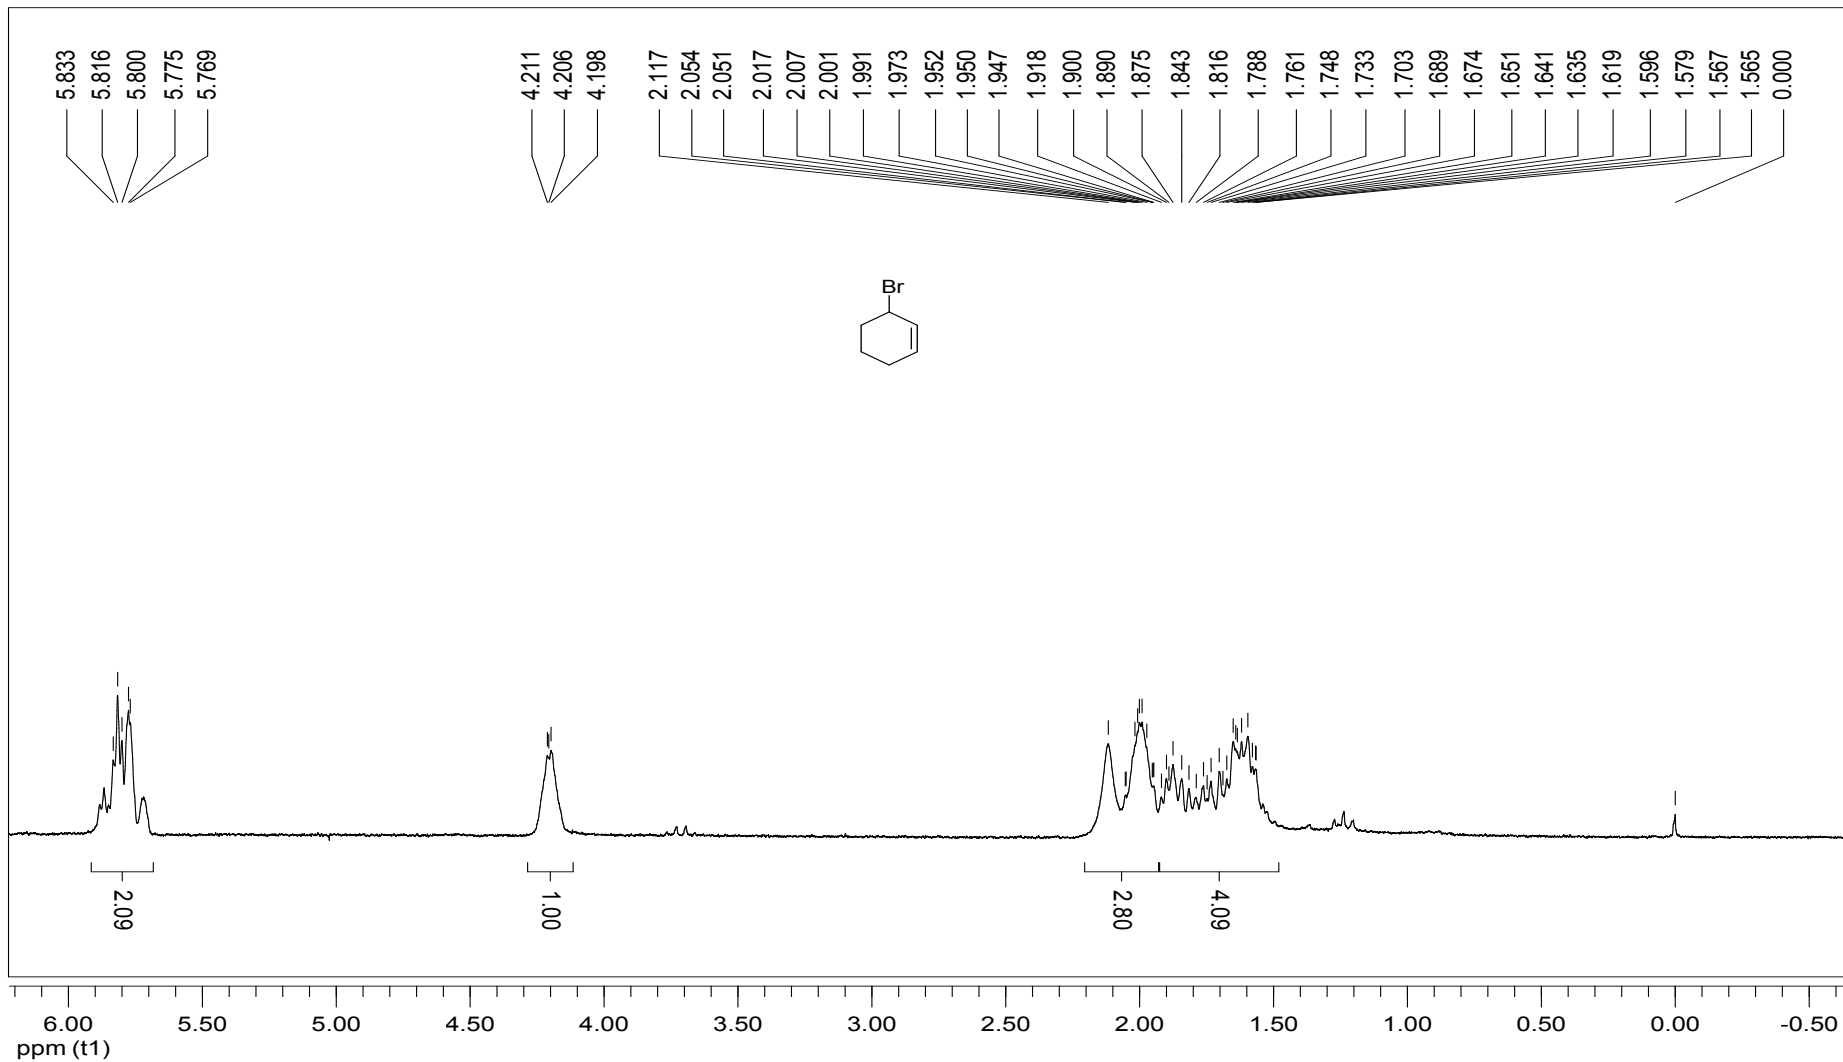

<sup>1</sup>H NMR (200 MHz, CDCl<sub>3</sub>) spectrum of **20**

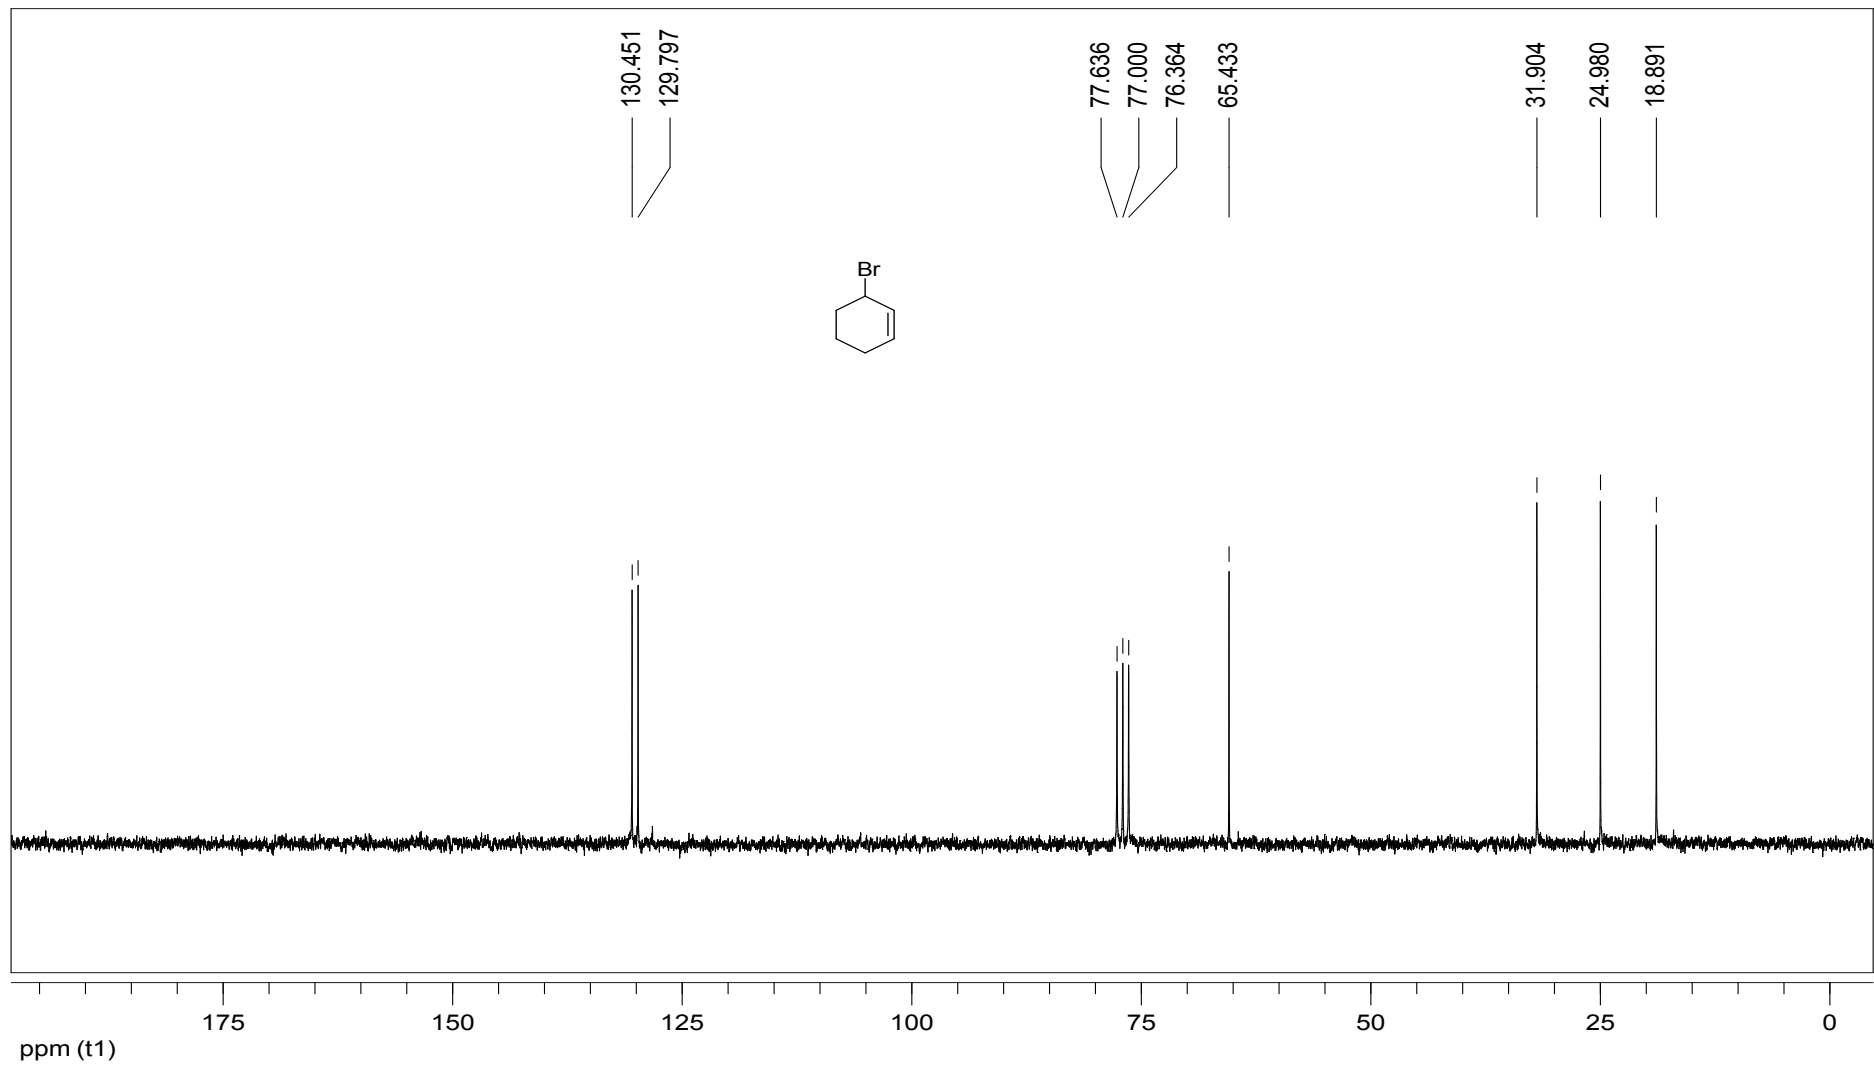

<sup>13</sup>C NMR (50 MHz, CDCl<sub>3</sub>) spectrum of 20
